# Mitochondrial unfolded protein response transcription factor ATFS-1 increases resistance to exogenous stressors through upregulation of multiple stress response pathways

Sonja K. Soo<sup>1,2</sup>, Annika Traa<sup>1,2</sup>, Meeta Mistry<sup>3</sup>, Jeremy M. Van Raamsdonk<sup>1,2,4,5</sup>

<sup>1</sup>Department of Neurology and Neurosurgery, McGill University, Montreal, Quebec, Canada

<sup>2</sup>Metabolic Disorders and Complications Program, and Brain Repair and Integrative Neuroscience Program, Research Institute of the McGill University Health Centre, Montreal, Quebec, Canada

<sup>3</sup>Bioinformatics Core, Harvard School of Public Health, Harvard Medical School, Boston, MA, USA

<sup>4</sup>Division of Experimental Medicine, Department of Medicine, McGill University, Montreal, Quebec, Canada

<sup>5</sup>Department of Genetics, Harvard Medical School, Boston, MA, USA

**Short title:** ATFS-1 promotes stress resistance

## Corresponding Author:

Jeremy M. Van Raamsdonk

Research Institute of the McGill University Health Centre

1001 Decarie Blvd., Montreal, Quebec, Canada

1-514-934-1934 ext. 76157, [jeremy.vanraamsdonk@mcgill.ca](mailto:jeremy.vanraamsdonk@mcgill.ca)

1 **Abstract**

2

3 The mitochondrial unfolded protein response (mitoUPR) is an evolutionarily conserved pathway  
4 that responds to various insults to the mitochondria through transcriptional changes that  
5 restore mitochondrial homeostasis in order to facilitate cell survival. Gene expression changes  
6 resulting from the activation of the mitoUPR are mediated by the transcription factor ATFS-  
7 1/ATF-5. To further define the mechanisms through which the mitoUPR protects the cell during  
8 mitochondrial dysfunction, we characterized the role of ATFS-1 in responding to organismal  
9 stress. We found that activation of ATFS-1 is sufficient to cause upregulation of genes involved  
10 in multiple stress response pathways, including the DAF-16-mediated stress response pathway,  
11 the SKN-1-mediated oxidative stress response pathway, the HIF-mediated hypoxia response  
12 pathway, the p38-mediated innate immune response pathway, and antioxidant genes.  
13 Moreover, ATFS-1 is required for the upregulation of stress response genes after exposure to  
14 exogenous stressors, especially oxidative stress and bacterial pathogens. Constitutive activation  
15 of ATFS-1 increases resistance to multiple acute exogenous stressors, while disruption of *atfs-1*  
16 decreases stress resistance. Although ATFS-1-dependent genes are upregulated in multiple  
17 long-lived mutants, constitutive activation of ATFS-1 in wild-type animals results in decreased  
18 lifespan. Overall, our work demonstrates that ATFS-1 serves a vital role in organismal survival of  
19 acute stresses through its ability to activate multiple stress response pathways, but that chronic  
20 ATFS-1 activation is detrimental for longevity.

21

22

23 **Keywords:** Aging; Mitochondria; Mitochondrial unfolded protein response; ATFS-1; Stress  
24 resistance; *C. elegans*; Genetics; Lifespan; RNA sequencing

## 25 Introduction

26

27 The mitochondrial unfolded protein response (mitoUPR) is a stress response pathway  
28 that acts to reestablish mitochondrial homeostasis through inducing transcriptional changes of  
29 genes involved in metabolism and restoration of mitochondrial protein folding [1]. Various  
30 perturbations to the mitochondria can activate mitoUPR, including excess reactive oxygen  
31 species (ROS) and defects in mitochondrial import machinery [2]. The mitoUPR is mediated by  
32 the transcription factor ATFS-1 (activating transcription factor associated with stress-1) in *C.*  
33 *elegans* [3], or ATF5 in mammals [4].

34

35 ATFS-1/ATF5 regulates mitoUPR through its dual targeting domains, a mitochondrial  
36 targeting sequence (MTS) and a nuclear localization signal (NLS). Under normal unstressed  
37 conditions, the MTS causes ATFS-1 to enter the mitochondria through the HAF-1 import  
38 channel. Inside the mitochondria, ATFS-1 is degraded by the Lon protease CLPP-1/CLP1 [3].  
39 However, mitochondrial stress disrupts ATFS-1 import into the mitochondria, resulting in  
40 cytoplasmic accumulation of ATFS-1. The NLS of the cytoplasmic ATFS-1 then targets it to the  
41 nucleus, where ATFS-1 acts with the transcription factor DVE-1 and transcriptional regulator  
42 UBL-5 to upregulate expression of chaperones, proteases, and other proteins [5].

43

44 In order to study the role of the mitoUPR in longevity, we previously disrupted *atfs-1* in  
45 long-lived *nuo-6* mutants, which contain a point mutation that affects Complex I of the electron  
46 transport chain [6]. *nuo-6* mutants have a mild impairment of mitochondrial function that leads  
47 to increased lifespan and enhanced resistance to multiple stressors. We found that loss of *atfs-*  
48 *1* not only decreased the lifespan of *nuo-6* worms, but also abolished the increased stress  
49 resistance of these worms, thereby suggesting that ATFS-1 contributes to both longevity and  
50 stress resistance in these worms [7].

51

52 While a role for the mitoUPR in longevity has been reported [8-11], and debated [12,  
53 13], little is known about the role of ATFS-1 in response to exogenous stressors. Pellegrino *et al.*

54 found that activation of ATFS-1 can increase organismal resistance to the pathogenic bacteria *P.*  
55 *aeruginosa* [14], while Pena *et al.* showed that ATFS-1 activation can protect against anoxia-  
56 reperfusion-induced death [15].

57

58 In this study, we use *C. elegans* to define the relationship between ATFS-1 and  
59 organismal stress resistance, and explore the underlying mechanisms. We find that activation of  
60 ATFS-1 is sufficient to upregulate genes from multiple stress response pathways and is  
61 important for transcriptional changes induced by oxidative stress and bacterial pathogen  
62 exposure. Constitutive activation of ATFS-1 is also sufficient to increase resistance to multiple  
63 stressors. While ATFS-1-dependent genes are upregulated in several long-lived mutants  
64 representative of multiple pathways of lifespan extension, chronic activation of ATFS-1 does not  
65 extend longevity. Overall, our results demonstrate a crucial role for ATFS-1 in organismal stress  
66 response through activation of multiple stress response pathways.

## 67 **Results**

68

### 69 **ATFS-1 activates genes from multiple stress response pathways**

70 Mild impairment of mitochondrial function through a mutation in *nuo-6* results in the activation  
71 of the mitoUPR. We previously performed a bioinformatic analysis of genes that are  
72 upregulated in *nuo-6* mutants in an ATFS-1-dependent manner, and discovered an enrichment  
73 for genes associated with the GO term “response to stress” [7]. Based on this observation, we  
74 hypothesized that ATFS-1 may be able to activate other stress response pathways. To test this  
75 hypothesis, we quantified the expression of established target genes from eight different stress  
76 response pathways under conditions where ATFS-1 is either activated, or where ATFS-1 is  
77 disrupted.

78

79 To activate ATFS-1, we used the *nuo-6* mutation. We also examined gene expression in  
80 two different gain-of-function (GOF) mutants with constitutively active ATFS-1: *atfs-1(et15)* and  
81 *atfs-1(et17)*. Both of these constitutively active ATFS-1 mutants have mutations in the MTS  
82 causing increased nuclear localization of ATFS-1 [16]. We used a loss-of-function (LOF) *atfs-1*  
83 deletion mutation (*gk3094*) to disrupt ATFS-1 function in wild-type and *nuo-6* mutants.

84

85 Expression of specific stress response target genes were examined: *hsp-6* in the  
86 mitochondrial unfolded protein response (mitoUPR) pathway; *hsp-4* in the endoplasmic  
87 reticulum unfolded protein response (ER-UPR) pathway; *hsp-16.2* in the cytoplasmic unfolded  
88 protein response pathway (cytoUPR); *sod-3* in the DAF-16-mediated stress response pathway;  
89 *gst-4* in the SKN-1-mediated stress response pathway; *nhr-57* in the HIF-1-mediated hypoxia  
90 response pathway; *Y9C9A.8* in the p38-mediated innate immunity pathway; and *trx-2*, an  
91 antioxidant gene (**Table S1**).

92

93 We found that compared to wild-type worms, *atfs-1(gk3094)* deletion mutants did not  
94 have decreased expression levels for the target genes of any of the stress response pathways

95 **(Fig. 1)**. This indicates that ATFS-1 is not required for the basal expression levels of these stress  
96 response genes.

97  
98 Activation of the mitoUPR through mutation of *nuo-6* resulted in significant  
99 upregulation of target genes from the mitoUPR (*hsp-6*; **Fig. 1A**), the DAF-16-mediated stress  
100 response (*sod-3*; **Fig. 1D**), the SKN-1-mediated oxidative stress response (*gst-4*; **Fig. 1E**), the HIF-  
101 1-mediated hypoxia response (*nhr-57*; **Fig. 1F**), the p38-mediated innate immunity pathway  
102 (*Y9C9A.8*; **Fig. 1G**), and antioxidant defense (*trx-2*; **Fig. 1H**). Importantly, for all of these genes,  
103 inhibiting the mitoUPR through deletion of *atfs-1* prevented the upregulation of the stress  
104 response in *nuo-6;atfs-1(gk3094)* worms (**Fig. 1A, D-H**), indicating that ATFS-1 is required for  
105 the activation of these stress pathway genes during mitochondrial stress.

106  
107 Constitutive activation of ATFS-1 in *atfs-1(et 15)* and *atfs-1(et17)* mutants resulted in  
108 upregulation of most of the same genes that are upregulated in *nuo-6* mutants, except for *gst-4*  
109 in the SKN-1 pathway (**Fig. 1A, D-H**). This indicates that ATFS-1 activation is sufficient to induce  
110 upregulation of specific stress response genes independently of mitochondrial stress. Activating  
111 the mitoUPR through the *nuo-6* mutation, or through the constitutively-active ATFS-1 mutants  
112 did not significantly increase the expression of target genes from the ER-UPR (*hsp-4*; **Fig. 1B**) or  
113 the cyto-UPR (*hsp-16.2*; **Fig. 1C**).

114  
115 To gain a more comprehensive view of the extent to which mitoUPR activation causes  
116 upregulation of genes in other stress response pathways, we compared genes upregulated in  
117 the constitutively active *atfs-1* mutant, *atfs-1(et15)*, to genes upregulated by activation of  
118 different stress response pathways. As a proof-of-principle, we first examined the overlap  
119 between upregulated genes in *atfs-1(et15)* mutants and genes upregulated by activation of the  
120 mitoUPR with *spg-7* RNAi in an ATFS-1-dependent manner [3].

121  
122 We identified genes upregulated by the activation of other stress response pathways  
123 from published gene expression studies, and the genes and relevant pathways are listed in

124 **Table S3.** Target genes from the ER-UPR pathway were defined as genes upregulated by  
125 tunicamycin exposure and dependent on either *ire-1*, *xbp-1*, *pek-1* or *atf-6* [17]. Cyto-UPR  
126 pathway genes are genes upregulated by overexpression of heat shock factor 1 (HSF-1) and  
127 genes bound by HSF-1 after a thirty-minute heat shock at 34°C [18, 19]. DAF-16 pathway genes  
128 were identified by Tepper et al. by performing a meta-analysis of 46 previous gene expression  
129 studies, comparing conditions in which DAF-16 is activated (e.g. *daf-2* mutants) and conditions  
130 in which the activation is inhibited by disruption of *daf-16* (e.g. *daf-2;daf-16* mutants) [20]. SKN-  
131 1 pathway genes were identified as genes that exhibit decreased expression after *skn-1* RNAi in  
132 wild-type worms, genes that are upregulated in *glp-1* mutants in a SKN-1-dependent manner,  
133 genes that are upregulated by germline stem cell removal in a SKN-1-dependent manner [21],  
134 and genes upregulated in *daf-2* mutants in a SKN-1-dependent manner [22]. HIF-1-mediated  
135 hypoxia genes are genes induced by hypoxia in a HIF-1-dependent manner [23]. Innate  
136 immunity genes are defined as genes upregulated by exposure to *Pseudomonas aeruginosa*  
137 strain PA14 in a PMK-1- and ATF-7-dependent manner [24], where PMK-1 and ATF-7 are part of  
138 the p38-mediated innate immune signaling pathway. Finally, antioxidant genes is a  
139 comprehensive list of genes involved in antioxidant defense such as superoxide dismutases  
140 (*sod*), catalases (*ctl*), peroxiredoxins (*prdx*), or thioredoxins (*trx*).

141  
142 In comparing genes upregulated in the constitutively active *atfs-1* mutant *et15* to these  
143 previously published gene lists, we found that 51% of genes upregulated by *spg-7* RNAi in an  
144 ATFS-1-dependent manner are also upregulated by constitutive activation of ATFS-1 (**Fig. 2A**).  
145 Similarly, we found a highly significant overlap of upregulated genes between *atfs-1(et15)*  
146 mutants and each of the examined stress response pathways. We found that *atfs-1(et15)* had a  
147 25% overlap with genes of ER-UPR pathway (**Fig. 2B**); 22% overlap with genes of the Cyto-UPR  
148 pathway (**Fig. 2C**); 26% overlap with genes of the DAF-16-mediated stress pathway (**Fig. 2D**);  
149 30% overlap with genes of the SKN-1-mediated stress pathway (**Fig. 2E**); 23% overlap with  
150 genes of the HIF-1-mediated hypoxia pathway (**Fig. 2F**); 22% overlap with genes of the p38-  
151 mediated innate immunity pathway (**Fig. 2G**); and 33% overlap with antioxidant genes (**Fig. 2H**).

152 Combined, this indicates that activation of ATFS-1 is sufficient to upregulate genes in multiple  
153 stress response pathways.

154

### 155 **ATFS-1 is required for transcriptional responses to exogenous stressors**

156 Having shown that constitutive activation of ATFS-1 can induce upregulation of genes involved  
157 in various stress response pathways, we next sought to determine the role of ATFS-1 in the  
158 genetic response to different stressors. To do this, we exposed wild-type animals and *atfs-1*  
159 loss-of-function mutants (*atfs-1(gk3094)*) to six different types of stress and quantified the  
160 resulting upregulation of stress response genes using quantitative RT-PCR (qPCR). We found  
161 that exposure to either oxidative stress (4 mM paraquat, 48 hours) or the bacterial pathogen  
162 *Pseudomonas aeruginosa* strain PA14 induced a significant upregulation of stress response  
163 genes in wild-type worms, but that this upregulation was suppressed by disruption of *atfs-1*  
164 (**Fig. 3A,B**). In contrast, exposure to heat stress (35°C, 2 hours; **Fig. 3C**), osmotic stress (300 mM  
165 NaCl, 24 hours; **Fig. 3D**), anoxic stress (24 hours; **Fig. 3E**), or ER stress (tunicamycin for 24 hours;  
166 **Fig. 3F**) caused upregulation of stress response genes in both wild-type and *atfs-1(gk3094)*  
167 worms to a similar extent. Combined, these results indicate that ATFS-1 is required for  
168 upregulating stress response genes in response to exposure to oxidative stress or bacterial  
169 pathogens.

170

### 171 **Modulation of ATFS-1 levels affects resistance to multiple stressors**

172 Due to the crucial role of ATFS-1 in upregulating genes in multiple stress response pathways, we  
173 next sought to determine the extent to which activating ATFS-1 protects against exogenous  
174 stressors. To do this, we quantified resistance to stress in two constitutively active *atfs-1* gain-  
175 of-function mutants (*atfs-1(et15)*, *atfs-1(et17)*) compared to wild-type worms. For comparison,  
176 we also included an *atfs-1* loss-of-function deletion mutant (*atfs-1(gk3094)*), which we have  
177 previously shown to have decreased resistance to oxidative, heat, osmotic and anoxic stress [7].

178

179 We measured resistance to acute oxidative stress by exposing worms to 300 µM  
180 juglone. We found that both the gain-of-function mutants, *atfs-1(et15)* and *atfs-1(et17)*, have



181 increased resistance to acute oxidative stress compared to wild-type worms, while *atfs-*  
182 *1(gk3094)* deletion mutants were less resistant compared to wild-type worms (**Fig. 4A**). To test  
183 resistance to chronic oxidative stress, worms were transferred to plates containing 4 mM  
184 paraquat beginning at day 1 of adulthood. Similar to the acute assay, *atfs-1(et17)* mutants were  
185 more resistant to chronic oxidative stress, while *atfs-1(gk3094)* mutants were less resistant to  
186 chronic oxidative stress compared to wild-type worms (**Fig. 4B**). Oddly, *atfs-1(et15)* gain-of-  
187 function mutants exhibited decreased resistance to chronic oxidative stress.

188  
189 Resistance to heat stress was measured at 37°C. None of the mutants showed increased  
190 survival during heat stress, with *atfs-1(et15)* and *atfs-1(gk3094)* mutants both showing a  
191 significant decrease in survival compared to wild-type worms (**Fig. 4C**). Resistance to osmotic  
192 stress was quantified on plates containing 450 mM or 500 mM NaCl after 48 hours. At both  
193 concentrations, the constitutively active *atfs-1* mutants had increased survival compared to  
194 wild-type worms, while *atfs-1(gk3094)* deletion mutants had decreased survival, although the  
195 difference was only significant at 500 mM (**Fig. 4D, E**). Resistance to anoxic stress was measured  
196 by placing worms in an oxygen-free environment for 75 hours, followed by a 24-hour recovery.  
197 We observed increased survival in *atfs-1(et15)* and *atfs-1(et17)* mutants and decreased survival  
198 in *atfs-1(gk3094)* mutant compared to wild-type worms (**Fig. 4F**).

199  
200 Lastly, to test resistance to bacterial pathogens, worms were exposed to *Pseudomonas*  
201 *aeruginosa* strain PA14 in either a fast kill assay in which worms die from a toxin produced by  
202 the bacteria, or a slow kill assay in which worms die due to the intestinal colonization of the  
203 pathogenic bacteria [25]. In the fast kill assay, we found that constitutive activation of ATFS-1  
204 increases survival in *atfs-1(et15)* and *atfs-1(et17)* mutants (**Fig. 4G**). We also observed increased  
205 survival in *atfs-1(gk3094)* deletion mutants. For the slow kill assay, we used two established  
206 protocols: one in which the assay is initiated at the L4 larval stage and performed at 25°C [14,  
207 25, 26] and one in which the assay is initiated at day three of adulthood and performed at 20°C  
208 [27]. Surprisingly, at 25°C, we found that *atfs-1(et17)* mutant had a small decrease in resistance  
209 to PA14, while *atfs-1(gk3094)* mutants exhibited a small increase in resistance to PA14

210 compared to wild-type worms (**Fig. 4H**). At 20°C, both *atfs-1(gk3094)* and *atfs-1(et17)* mutants  
211 had a small increase in resistance to PA14 compared to wild-type worms (**Fig. I**).

212

213 All together, these data indicate that activation of ATFS-1 is sufficient to protect against  
214 oxidative stress, osmotic stress, anoxia, and bacterial pathogens but not heat stress. They also  
215 show that ATFS-1 is required for wild-type worms to survive oxidative stress, heat stress,  
216 osmotic stress, and anoxia.

217

### 218 **Long-lived genetic mutants have upregulation of ATFS-1 target genes**

219 We previously showed that ATFS-1 target genes are upregulated in three long-lived  
220 mitochondrial mutants: *clk-1*, *isp-1* and *nuo-6* [6, 7, 28, 29]. To determine if ATFS-1 target genes  
221 are specifically upregulated in long-lived mitochondrial mutants, or if they are also upregulated  
222 in other mutants with extended longevity, we compared gene expression in six additional long-  
223 lived mutants, which act through other longevity-promoting pathways, to genes that are  
224 upregulated by ATFS-1 activation. These long-lived mutants included *sod-2* mutants, which act  
225 through increasing mitochondrial reactive oxygen species (ROS) [30]; *daf-2* mutants, which  
226 have reduced insulin-IGF1 signaling [31]; *glp-1* mutants, which have germline ablation [32]; *ife-2*  
227 mutants, which have reduced translation [33]; *osm-5* with reduced chemosensation [34]; and  
228 *eat-2* with dietary restriction [35].

229

230 After identifying genes that are differentially expressed in each of these long-lived  
231 mutants, we compared the differentially expressed genes to genes that are upregulated by  
232 ATFS-1 activation. We defined ATFS-1-upregulated genes in two ways: (1) genes that are  
233 upregulated by *spg-7* RNAi in an ATFS-1-dependent manner [3]; and (2) genes that are  
234 upregulated in a constitutively active *atfs-1* mutant (*et15*; [7]).

235

236 We found that the majority of the long-lived mutants examined had a significant  
237 enrichment of ATFS-1 target genes. In comparing the number of overlapping genes between  
238 genes upregulated in each long-lived mutant and genes upregulated by *spg-7* RNAi in an ATFS-

239 1-dependent manner, the degree of overlap was significantly greater than would be expected  
240 by chance for *clk-1* (6.7 fold enrichment), *isp-1* (6.0 fold enrichment), *sod-2* (5.5 fold  
241 enrichment), *nuo-6* (4.1 fold enrichment), *daf-2* (2.6 fold enrichment), *glp-1* (2.0 fold  
242 enrichment), and *ife-2* mutants (1.5 fold enrichment)(**Fig. 5**). We did not find a significant  
243 enrichment of ATFS-1 targets in *osm-5* and *eat-2* worms (**Fig. 5**).

244  
245 In comparing the number of overlapping genes between genes upregulated in each  
246 long-lived mutant and genes upregulated in the constitutively active *atfs-1(et15)* mutant, we  
247 found that the degree of overlap was significantly greater than would be expected by chance  
248 for *isp-1* (3.5 fold enrichment), *sod-2* (3.4 fold enrichment), *clk-1* (3.3 fold enrichment), *nuo-6*  
249 (2.5 fold enrichment), *daf-2* (2.4 fold enrichment), *glp-1* (1.8 fold enrichment), *ife-2* (1.8 fold  
250 enrichment), and *eat-2* mutants (1.5 fold enrichment) (**Fig. S1**). We did not observe a significant  
251 enrichment of ATFS-1 targets in *osm-5* mutants (**Fig. S1**).

252  
253 Overall, these results indicate that ATFS-1 target genes are upregulated in multiple long-  
254 lived mutants, including mutants in which mitochondrial function is not directly disrupted.

255  
256 **Constitutively active *atfs-1* mutants have decreased lifespan despite enhanced resistance to**  
257 **stress**

258 Having shown that ATFS-1 target genes are activated in multiple long-lived mutants, we sought  
259 to determine if ATFS-1 activation is sufficient to increase lifespan, and whether the presence of  
260 ATFS-1 is required for normal longevity in wild-type worms. Despite having increased resistance  
261 to multiple stresses, both constitutively active *atfs-1* mutants (*et15* and *et17*) have decreased  
262 lifespan compared to wild-type worms (**Fig. 6A,B**), which is consistent with a previous study  
263 finding shortened lifespan in *atfs-1(et17)* and *atfs-1(et18)* worms [13]. Despite having  
264 decreased resistance to multiple stresses, *atfs-1* deletion mutants (*gk3094*), had a lifespan  
265 comparable to wild-type worms (**Fig. 6C**), as we have previously observed [7]. Combined, this  
266 indicates that ATFS-1 does not play a major role in lifespan determination in a wild-type  
267 background despite having an important role in stress resistance.

## 268 **Discussion**

269  
270 Mitochondria are vital for organismal health as they perform multiple crucial functions within  
271 the cell including energy generation, metabolic reactions and intracellular signaling.  
272 Accordingly, it is important for cell and organismal survival maintain mitochondrial function  
273 during times of acute stress, and throughout normal aging. The mitoUPR is a conserved  
274 pathway that facilitates restoration of mitochondrial homeostasis after internal or external  
275 stresses. In this work, we demonstrate a crucial role for the mitoUPR transcription factor ATFS-1  
276 in the genetic response to external stressors which ultimately promotes survival of the  
277 organism.

### 278 279 **ATFS-1 is not required for normal longevity**

280 A number of studies have directly or indirectly examined the role of the mitoUPR and or ATFS-1  
281 in longevity. In these studies, mitoUPR activation was typically measured using a mitoUPR  
282 reporter strain that expresses GFP under the promoter of *hsp-6*, which is a target gene of ATFS-  
283 1 and the mitoUPR.

284  
285 A relationship between the mitoUPR and longevity was initially supported by the  
286 observation that disruption of the mitochondrial electron transport chain (ETC) by RNAi  
287 knockdown of the cytochrome c oxidase-1 (*cco-1*) gene resulted in both increased lifespan [36]  
288 and activation of the mitoUPR [8, 37]. Since then, other lifespan-extending mutations have also  
289 been shown to activate the mitoUPR, including three long-lived mitochondrial mutants, *clk-1*,  
290 *isp-1* and *nuo-6* [7].

291  
292 To explore this relationship in more comprehensive manner, Runkel *et al.* compiled a list  
293 of genes that activate the mitoUPR and looked at their effect on lifespan. Of the 99 genes  
294 reported to activated the mitoUPR, 58 resulted in increased lifespan, while only 7 resulted in  
295 decreased lifespan [38]. Bennet *et al.* performed an RNAi screen to identify RNAi clones that  
296 increase expression of a reporter of mitoUPR activity (*hsp-6p::GFP*) and measured the effect of

297 a selection of these clones on lifespan [13]. Of the 19 mitoUPR-inducing RNAi clones that they  
298 tested, 10 RNAi clones increased lifespan, while 6 decreased lifespan [13]. Using a similar  
299 approach to screen for compounds that activate a mitoUPR reporter strain (*hsp-6p::GFP*),  
300 metolazone was identified as a compound that activates the mitoUPR, and extends lifespan in  
301 an ATFS-1-dependent manner [39]. Combined these results indicate that there are multiple  
302 genes or interventions which activate the mitoUPR and extend longevity, but there are also  
303 examples in which these phenotypes are uncoupled.

304

305 Multiple experiments including the present study have also looked at the effect of the  
306 mitoUPR on lifespan directly by either increasing or decreasing the expression of components  
307 of the mitoUPR. Knocking down *atfs-1* expression using RNAi does not decrease wild-type  
308 lifespan [7, 13, 40], nor do deletions in the *atfs-1* gene decrease wild-type lifespan (**Fig. 6**; [7,  
309 13]). Thus, despite activation of the mitoUPR being correlated with longevity, ATFS-1 is not  
310 required for normal lifespan in a wild-type animal.

311

### 312 **ATFS-1 mediates lifespan extension in long-lived mutants**

313 While ATFS-1 is dispensable for wild-type lifespan, ATFS-1 is required for lifespan extension of  
314 multiple long-lived mutants. Longevity can be extended by disrupting mito-nuclear protein  
315 balance through knocking down the expression of mitochondrial ribosomal protein S5 (*mrsp-5*),  
316 which also increases the expression of mitoUPR target gene *hsp-6*. The magnitude of the  
317 lifespan extension caused by *mrsp-5* RNAi is decreased by knocking down key mitoUPR  
318 component genes *haf-1* or *ubl-5* [11]. In the long-lived mitochondrial mutant *nuo-6*, deletion of  
319 *atfs-1* completely reverts the long lifespans to wild-type length, and treatment with *atfs-1* RNAi  
320 has similar effects [7]. In mitochondrial mutant *isp-1* worms, knocking down the a key initiator  
321 of mitoUPR, *ubl-5*, decreases their long lifespan but has no effect on the lifespan of wild-type  
322 worms [8]. In contrast it has been reported that knockdown of *atfs-1* using RNAi does not  
323 decrease *isp-1* lifespan [13]. However, it is possible that in the latter study that the magnitude  
324 knockdown was not sufficient to have effects on lifespan, as we and others have found that life-  
325 long exposure to *atfs-1* RNAi prevents larval development of *isp-1* worms [7, 41]. Similarly,

326 differing results have been obtained for the requirement of the mitoUPR in the extended  
327 lifespan resulting from *cco-1* knockdown. While it has been reported that mutation of *atfs-1*  
328 does not decrease lifespan of worms treated with *cco-1* RNAi, despite preventing activation of  
329 mitoUPR reporter [13], a subsequent study showed that *atfs-1* RNAi decreases the extent of  
330 lifespan extension resulting from *cco-1* RNAi [40]. While differing results have been observed in  
331 some cases, overall, these studies suggest a role of ATFS-1 and the mitoUPR in mediating the  
332 lifespan extension in a subset of long-lived mutants.

333

334         Despite the fact that long-lived mutants with chronic activation of the mitoUPR depend  
335 on ATFS-1 for their long lifespan, our current results using the constitutively active *atfs-1(et15)*  
336 and *atfs-1(et17)* mutants, as well as previous results using constitutively active *atfs-1* mutants  
337 (*et17* and *et18*) show that constitutive activation of ATFS-1 in wild-type worms results in  
338 decreased lifespan [13]. This may be partially due to activation of ATFS-1 increasing the  
339 proportion of damaged mtDNA when heteroplasmy exists [42]. Consistent with this finding,  
340 overexpression of the mitoUPR target gene *hsp-60* also leads to a small decrease in lifespan  
341 [43]. In contrast, overexpression of a different mitoUPR target gene, *hsp-6*, is sufficient to  
342 increase lifespan [44]. It has also been shown that a hypomorphic reduction-of-function  
343 mutation allele of *hsp-6 (mg583)* can also increase lifespan, while *hsp-6* null mutations are  
344 thought to be lethal [45]. Combined these results indicate that chronic activation of the  
345 mitoUPR is mildly detrimental for lifespan, but that modulation of specific target genes can be  
346 beneficial.

347

#### 348 **ATFS-1 is necessary for stress resistance in wild-type animals**

349 While ATFS-1 is not required for longevity in wild-type animals, it plays a significant role in  
350 protecting animals against exogenous stressors. Disrupting *atfs-1* function decreases  
351 organismal resistance to oxidative stress, heat stress, osmotic stress, and anoxia (**Fig. 4**).  
352 Additionally, we previously determined that inhibiting *atfs-1* in long-lived *nuo-6* worms  
353 completely prevented the increased resistance to oxidative stress, osmotic stress and heat  
354 stress typically observed in that mutant [7], and that disruption of *atfs-1* in Parkinson's disease

355 mutants *pdr-1* and *pink-1* decreased their resistance to oxidative stress, osmotic stress, heat  
356 stress, and anoxia [46]. Combined, these results demonstrate that ATFS-1 is required for  
357 resistance to multiple types of exogenous stressors.

358

359 Even though ATFS-1 is required for the upregulation of stress response genes in  
360 response to bacterial pathogens (**Fig. 3**), deletion of *atfs-1* (*gk3094* mutation) did not impact  
361 bacterial pathogen resistance. Similarly, another *atfs-1* deletion mutation (*tm4919*) was found  
362 not to affect survival during exposure to *P. aeruginosa* [14]. Knocking down *atfs-1* through  
363 RNAi inconsistently decreased survival on *P. aeruginosa* (e.g. Fig.3a versus Fig.3h in [14]). While  
364 the effect of *atfs-1* disruption on bacterial pathogen resistance was variable, decreasing the  
365 expression of a downstream ATFS-1 target gene, *hsp-60*, by RNAi caused a robust decrease in  
366 organismal survival on *P. aeruginosa* [43]. As we have previously found that disrupting *atfs-1*  
367 induces upregulation of other protective cellular pathways [7] and others have observed a  
368 similar phenomenon when a mitoUPR downstream target, *hsp-6*, is disrupted [47], it is possible  
369 that the upregulation of other stress pathways may compensate for the inhibition of the  
370 mitoUPR, ultimately yielding wild-type or increased levels of resistance to bacterial pathogens,  
371 and hiding the normal role of the mitoUPR in resistance to bacterial pathogens.

372

### 373 **Activation of ATFS-1 enhances resistance to exogenous stressors**

374 In this work, we show that constitutive activation of ATFS-1 (*atfs-1(et15)* and *atfs-1(et17)*  
375 mutants) is sufficient to increase resistance to multiple different exogenous stressors, including  
376 acute oxidative stress, osmotic stress, anoxia and bacterial pathogens. Previous studies have  
377 shown that activating the mitoUPR, either through *spg-7* RNAi or through a constitutively active  
378 *atfs-1(et15)* mutant, decreased risk of death after anoxia-reperfusion [15], and that  
379 constitutively active *atfs-1(et18)* mutants also have increased resistance to *P. aeruginosa* [14].  
380 Overexpression of the mitoUPR target gene *hsp-60* also increases resistance to *P. aeruginosa*  
381 [43]. These results support a clear role for ATFS-1 in surviving external stressors.

382

383

384 **ATFS-1 upregulates target genes of multiple stress response pathways**

385 In exploring the mechanism by which ATFS-1 and the mitoUPR modulate stress resistance, we  
386 found that activation of ATFS-1, through either a mutation that mildly impairs mitochondrial  
387 function (*nuo-6*) or through a mutation that constitutively activates ATFS-1 (*atfs-1(et15)*),  
388 causes upregulation of genes involved in multiple stress response pathways including the ER-  
389 UPR pathway, the Cyto-UPR pathway, the DAF-16-mediated stress response pathway, the SKN-  
390 1-mediated oxidative stress response pathway, the HIF-mediated hypoxia response pathway,  
391 the p38-mediated innate immune response pathway and antioxidant genes (**Fig. 2**). These  
392 findings are supported by earlier work demonstrating a role for ATFS-1 in upregulating genes  
393 involved in innate immunity. Pellegrino *et al.* reported a 16% (59/365 genes) overlap between  
394 genes upregulated by activation of the mitoUPR through treatment with *spg-7* RNAi and genes  
395 upregulated by exposure a bacterial pathogen [14]. A connection between the mitoUPR and the  
396 innate immunity pathway was also suggested by the finding that overexpression of a mitoUPR  
397 downstream target, *hsp-60*, increases expression of three innate immunity genes: T24B8.5,  
398 C17H12.8 and K08D8.5 [43]. Our results clearly indicate that the role of ATFS-1 in stress  
399 response pathways is not limited to the innate immunity, but extends to multiple stress  
400 response pathways, thereby providing a mechanistic basis for the effect of ATFS-1 on resistance  
401 to stress.



402 **Conclusions**

403 The mitoUPR is required for animals to survive exposure to exogenous stressors, and activation  
404 of this pathway is sufficient to enhance resistance to stress (**Table S4**). In addition to  
405 upregulating genes involved in restoring mitochondrial homeostasis, the mitoUPR increases  
406 stress resistance by upregulating the target genes of multiple stress response pathways.  
407 Although increased stress resistance has been associated with long lifespan, and multiple long-  
408 lived mutants exhibit activation of the mitoUPR, constitutive activation of ATFS-1 shortens  
409 lifespan while increasing resistance to stress, indicating that the role of ATFS-1 in stress  
410 resistance can be experimentally dissociated from its role in longevity. Overall, this work  
411 highlights the importance of the mitoUPR in not only protecting organisms from internal stress,  
412 but also improving organismal survival upon exposure to external stressors.

## 413 **Materials and Methods**

414

### 415 **Strains**

416 *C. elegans* strains were obtained from the *Caenorhabditis* Genetics Center (CGC): N2 (wild-  
417 type), *nuo-6(qm200)*, *atfs-1(gk3094)*, *nuo-6(qm200);atfs-1(gk3094)*, *atfs-1(et15)*, *atfs-1(et17)*,  
418 *ife-2(ok306)*, *clk-1(qm30)*, *sod-2(ok1030)*, *eat-2(ad1116)*, *osm-5(p813)*, *isp-1(qm150)*, *daf-*  
419 *2(e1370)*, and *glp-1(e2141)*. Strains were maintained at 20°C on nematode grown medium  
420 (NGM) plates seeded with OP50 *E. coli*.

421

### 422 **Gene expression in response to stress**

423 *Stress treatment:* Young adult worms were subject to different stress before mRNA was  
424 collected. For heat stress, worms were incubated at 35°C for 2 hours and 20°C for 4 hours. For  
425 oxidative stress, worms were transferred to plates containing 4 mM paraquat and 100 µM FUdR  
426 for 48 hours. For ER stress, worms were transferred to plates containing 5 µg/mL tunicamycin  
427 for 24 hours. For osmotic stress, worms were transferred to plates containing 300 mM NaCl for  
428 24 hours. For bacterial pathogen stress, worms were transferred to plates seeded with  
429 *Pseudomonas aeruginosa* strain PA14 for 4 hours. For anoxic stress, worms were put in BD Bio-  
430 Bag Type A Environmental Chambers (Becton, Dickinson and Company, NJ) for 24 hours and left  
431 to recover for 4 hours. For unstressed control conditions, worms were collected at the young  
432 adult stage and at Day 1 adult stage. For Day 2 adult control, worms were transferred NGM  
433 plates containing 100µM FUdR and collected 2 days later.

434

435 *RNA isolation:* RNA was harvested as described previously [48]. Plates of worms were washed  
436 three times using M9 buffer to remove bacteria and resuspended in TRIZOL reagent. Worms  
437 were frozen in a dry ice/methanol bath and then thawed three times and left at room  
438 temperature for 15 minutes. Chloroform was mixed into the tubes and mixture was left to sit at  
439 room temperature for 3 minutes. Tubes were then centrifuged at 12,000 g for 15 minutes at  
440 4°C. The upper phase containing the RNA was transferred to a new tube, mixed with  
441 isopropanol, and allowed to sit at room temperature for 10 minutes. Tubes were centrifuged at

442 12,000 g for 10 minutes at 4°C. The RNA pellet was washed with 75% ethanol and resuspended  
443 in RNase-free water.

444

445 Quantitative RT-PCR: mRNA was converted to cDNA using a High-Capacity cDNA Reverse  
446 Transcription kit (Life Technologies/Invitrogen) as described previously [49]. qPCR was  
447 performed using a PowerUp SYBR Green Master Mix kit (Applied Biosystems) in a Vii7 RT-PCR  
448 machine from Applied Biosystems. All experiments were performed with least three biological  
449 replicates collected from different days. mRNA levels were normalized to *act-3* levels and then  
450 expressed as a percentage of wild-type. Primer sequences are as follows:

451 *gst-4* (CTGAAGCCAACGACTCCATT, GCGTAAGCTTCTCCTCTGC),  
452 *hsp-4* (CTCGTGGAATCAACCCTGAC, GACTATCGGCAGCGGTAGAG),  
453 *hsp-6* (CGCTGGAGATAAGATCATCG, TTCACGAAGTCTCTGCATGG),  
454 *hsp-16.2* (CCATCTGAGTCTTCTGAGATTGTT, CTTTCTTTGGCGCTTCAATC),  
455 *sod-3* (TACTGCTCGCACTGCTTCAA, CATAGTCTGGGCGGACATTT),  
456 *sod-5* (TTCCACAGGACGTTGTTTCC, ACCATGGAACGTCCGATAAC),  
457 *nhr-57* (GACTCTGTGTGGAGTGATGGAGAG, GTGGCTCTTGGTGTCAATTTCTGGG),  
458 *gcs-1* (CCACCAGATGCTCCAGAAAT, TGCATTTTCAAAGTCGGTC),  
459 *trx-2* (GTTGATTTCCACGCAGAATG, TGGCGAGAAGAACAACCTTCCT),  
460 *Y9C9A.8* (CGGGGATATAACTGATAGAATGG, CAAACTCTCCAGCTTCCAACA),  
461 *T24B8.5* (TACTGCTTCAGAGTCGTG, CGACAACCACTTCTAACATCTG),  
462 *clec-67* (TTTGGCAGTCTACGCTCGTT, CTCCTGGTGTGTCCCATTTT),  
463 *dod-22* (TCCAGGATACAGAATACGTACAAGA, GCCGTTGATAGTTTCTGGTGT),  
464 *ckb-2* (GCATTTATCCGAGACAGCGA, GCTTGCACGTCCAAATCAAC),  
465 *act-3* (TGCGACATTGATATCCGTAAGG, GGTGGTTCCTCCGAAAGAA).

466

#### 467 **RNA sequencing and bioinformatic analysis**

468 RNA sequencing was performed previously [50, 51] and raw data is available on NCBI GEO:  
469 GSE93724 [51], GSE110984 [7]. Bioinformatic analysis for this study was used to determine

470 differentially expressed genes and identify the degree and significance of overlaps between  
471 genes sets.

472

473 *Determining differentially expressed genes:* Samples were processed using an RNA-seq pipeline  
474 based on the bcbio-nextgen project (<https://bcbio-nextgen.readthedocs.org/en/latest/>). We  
475 examined raw reads for quality issues using FastQC  
476 (<http://www.bioinformatics.babraham.ac.uk/projects/fastqc/>) in order to ensure library  
477 generation and sequencing data were suitable for further analysis. If necessary, we used  
478 cutadapt <http://code.google.com/p/cutadapt/> to trim adapter sequences, contaminant  
479 sequences such as polyA tails, and low quality sequences from reads. We aligned trimmed  
480 reads to the Ensembl build WBcel235 (release 90) of the *C. elegans* genome using STAR [52].  
481 We assessed quality of alignments by checking for evenness of coverage, rRNA content,  
482 genomic context of alignments (for example, alignments in known transcripts and introns),  
483 complexity and other quality checks. To quantify expression, we used Salmon [53] to find  
484 transcript-level abundance estimates and then collapsed down to the gene-level using the R  
485 Bioconductor package tximport [54]. Principal components analysis (PCA) and hierarchical  
486 clustering methods were used to validate clustering of samples from the same batches  
487 and across different mutants. We used the R Bioconductor package DESeq2 [55] to find  
488 differential expression at the gene level. For each wildtype-mutant comparison, we identified  
489 significant genes using an FDR threshold of 0.01. Lastly, we included batch as a covariate in the  
490 linear model for datasets in which experiments were run across two batches.

491

492 *Venn diagrams:* Weighted Venn diagrams were produced by inputting gene lists into BioVenn  
493 (<https://www.biovenn.nl/>). Percentage overlap was determined by dividing the number of  
494 genes in common between the two gene sets by the gene list with the smaller gene list.

495

496 *Significance of overlap and enrichment:* The significance of overlap between two gene sets was  
497 determined by comparing the actual number of overlapping genes to the expected number of  
498 overlapping genes based on the sizes of the two gene sets (expected number = number of

499 genes in set 1 X number of genes in set 2/number of genes in genome detected). Enrichment  
500 was calculated as the observed number of overlapping genes/the expected number of  
501 overlapping genes if genes were chosen randomly.

502

### 503 **Resistance to stress**

504 For acute oxidative stress, young adult worms were transferred onto plates with 300  $\mu$ M  
505 juglone and survival was measured every 2 hours for a total of 10 hours. For chronic oxidative  
506 stress, young adult worms were transferred onto plates with 4 mM paraquat and 100  $\mu$ M FUdR  
507 and survival was measured daily until death.

508 For heat stress, young adult worms were incubated in 37°C and survival was measured every 2  
509 hours for a total of 10 hours. For osmotic stress, young adult worms were transferred to plates  
510 containing 450 mM or 500 mM NaCl and survival was measured after 48 hours.

511 For anoxic stress, plates with young adult worms were put into BD Bio-Bag Type A  
512 Environmental Chambers for 75 hours and survival was measured after a 24-hour recovery  
513 period.

514 Two different bacterial pathogenesis assays involving *P. aeruginosa* strain PA14 were  
515 performed. In the slow kill assay worms are thought to die from intestinal colonization of the  
516 pathogenic bacteria, while in the fast kill assay worms are thought to die from a toxin secreted  
517 from the bacteria [25]. The slow kill assay was performed as described previously [14, 27]. In  
518 the first protocol [14], PA14 cultures were grown overnight and seeded to center of a 35-mm  
519 NGM agar plate. Plates were left to dry overnight, and then incubated in 37°C for 24 hours.  
520 Plates were left to adjust to room temperature before approximately 40 L4 worms were  
521 transferred onto the plates. The assay was conducted 25°C and plates were checked twice a day  
522 until death. In the second protocol [27], overnight PA14 culture were seeded to the center of a  
523 35-mm NGM agar plate containing 20 mg/L FUdR. Plates were incubated at 37°C overnight,  
524 then at room temperature overnight before approximately 40 day three adults were  
525 transferred onto these plates. The assay was conducted 20°C and plates were checked daily  
526 until death. The fast kill pathogenesis assay was performed as described previously [25]. PA14

527 cultures were grown overnight and seeded to Peptone-Glucose-Sorbitol (PGS) agar plates.  
528 Seeded plates were left to dry for 20 minutes at room temperature before incubation at 37°C  
529 for 24 hours and then at 23°C for another 24 hours. Approximately 30 L4 worms were  
530 transferred onto the plates and were scored as dead or alive at 2, 4, 6, 8 and 24 hours. Fast kill  
531 plates were kept at 23°C in between scoring timepoints.

532

### 533 **Lifespan**

534 All lifespan assays were performed at 20°C. Lifespan assays included FUdR to limit the  
535 development of progeny and the occurrence of internal hatching. Based on our previous  
536 studies, a low concentration of FUdR (25mM) was used to minimize potential effects of FUdR  
537 on lifespan [56]. Animals were excluded from the experiment if they crawled off the plate or  
538 died of internal hatching of progeny or expulsion of internal organs.

539

### 540 **Statistical Analysis**

541 To ensure unbiased results, all experiments were conducted with the experimenter blinded to  
542 the genotype of the worms. For all assays, a minimum of three biological replicates of randomly  
543 selected worms from independent populations of worms on different days were used. For  
544 analysis of lifespan, oxidative stress, and bacterial pathogen stress, a log-rank test was used. For  
545 analysis of heat stress, repeated measures ANOVA was used. For analysis of osmotic stress and  
546 anoxic stress, a one-way ANOVA with Dunnett's multiple comparisons tests was used. For  
547 quantitative PCR results we used a two-way ANOVA with Bonferroni post-test. For all bar  
548 graphs error bars indicate standard error of the mean and bars indicate the mean.

549 **Acknowledgments.** We would like to thank Paige Rudich for carefully reviewing the manuscript  
550 prior to submission. Some strains were provided by the CGC, which is funded by NIH Office of  
551 Research Infrastructure Programs (P30 OD010440). We would also like to acknowledge the *C.*  
552 *elegans* knockout consortium and the National Bioresource Project of Japan for providing  
553 strains used in this research.

554  
555 **Competing interests.** The authors have declared that no competing interests exist.

556  
557 **Author Contributions.** Conceptualization: JVR. Methodology: SKS, AT, MM, JVR. Investigation:  
558 SKS, AT, MM, JVR. Analysis: SKS, AT, MM, JVR. Visualization: SKS, AT, MM, JVR. Writing –  
559 original draft: SKS, JVR. Writing – review and editing: SKS, AT, JVR. Supervision: JVR.

560  
561 **Materials & Correspondence.** Correspondence and material requests should be addressed to  
562 Jeremy Van Raamsdonk.

563  
564 **Data availability.** RNA-seq data has been deposited on GEO: GSE93724, GSE110984. All other  
565 data and strains generated in the current study are included with the manuscript or available  
566 from the corresponding author on request.

567  
568 **Funding.** This work was supported by the National Institute of General Medical Sciences  
569 (NIGMS; <https://www.nigms.nih.gov/>; JVR) by grant number R01 GM121756, the Canadian  
570 Institutes of Health Research (CIHR; <http://www.cihr-irsc.gc.ca/> ; JVR) and the Natural Sciences  
571 and Engineering Research Council of Canada (NSERC; [https://www.nserc-  
573 crsng.gc.ca/index\\_eng.asp](https://www.nserc-<br/>572 crsng.gc.ca/index_eng.asp); JVR). The funders had no role in study design, data collection and  
574 analysis, decision to publish, or preparation of the manuscript.

## 575 References

576

- 577 1. Zhao Q, Wang J, Levichkin I, Stasinopoulos S, Ryan M, Hoogenraad N. A mitochondrial specific  
578 stress response in mammalian cells. *The EMBO Journal*. 2002;21(17):4411±9.
- 579 2. Shpilka T, Haynes CM. The mitochondrial UPR: mechanisms, physiological functions and  
580 implications in ageing. *Nat Rev Mol Cell Biol*. 2018;19(2):109-20. Epub 2017/11/23. doi:  
581 10.1038/nrm.2017.110. PubMed PMID: 29165426.
- 582 3. Nargund AM, Pellegrino MW, Fiorese CJ, Baker BM, Haynes CM. Mitochondrial import efficiency  
583 of ATFS-1 regulates mitochondrial UPR activation. *Science*. 2012;337(6094):587-90. doi:  
584 10.1126/science.1223560. PubMed PMID: 22700657; PubMed Central PMCID: PMC3518298.
- 585 4. Fiorese CJ, Schulz AM, Lin YF, Rosin N, Pellegrino MW, Haynes CM. The Transcription Factor  
586 ATF5 Mediates a Mammalian Mitochondrial UPR. *Curr Biol*. 2016. doi: 10.1016/j.cub.2016.06.002.  
587 PubMed PMID: 27426517.
- 588 5. Jovaisaite V, Mouchiroud L, Auwerx J. The mitochondrial unfolded protein response, a  
589 conserved stress response pathway with implications in health and disease. *The Journal of experimental*  
590 *biology*. 2014;217(Pt 1):137-43. doi: 10.1242/jeb.090738. PubMed PMID: 24353213; PubMed Central  
591 PMCID: PMC3867496.
- 592 6. Yang W, Hekimi S. Two modes of mitochondrial dysfunction lead independently to lifespan  
593 extension in *Caenorhabditis elegans*. *Aging cell*. 2010;9(3):433-47. doi: 10.1111/j.1474-  
594 9726.2010.00571.x. PubMed PMID: 20346072.
- 595 7. Wu Z, Senchuk MM, Dues DJ, Johnson BK, Cooper JF, Lew L, et al. Mitochondrial unfolded  
596 protein response transcription factor ATFS-1 promotes longevity in a long-lived mitochondrial mutant  
597 through activation of stress response pathways. *BMC biology*. 2018;16(1):147. doi: 10.1186/s12915-018-  
598 0615-3. PubMed PMID: 30563508; PubMed Central PMCID: PMC6298126.
- 599 8. Durieux J, Wolff S, Dillin A. The cell-non-autonomous nature of electron transport chain-  
600 mediated longevity. *Cell*. 2011;144(1):79-91. doi: 10.1016/j.cell.2010.12.016. PubMed PMID: 21215371;  
601 PubMed Central PMCID: PMC3062502.
- 602 9. Berendzen KM, Durieux J, Shao LW, Tian Y, Kim HE, Wolff S, et al. Neuroendocrine Coordination  
603 of Mitochondrial Stress Signaling and Proteostasis. *Cell*. 2016;166(6):1553-63 e10. doi:  
604 10.1016/j.cell.2016.08.042. PubMed PMID: 27610575.
- 605 10. Merkwirth C, Jovaisaite V, Durieux J, Matilainen O, Jordan SD, Quiros PM, et al. Two Conserved  
606 Histone Demethylases Regulate Mitochondrial Stress-Induced Longevity. *Cell*. 2016. doi:  
607 10.1016/j.cell.2016.04.012. PubMed PMID: 27133168.
- 608 11. Houtkooper RH, Mouchiroud L, Ryu D, Moullan N, Katsyuba E, Knott G, et al. Mitonuclear  
609 protein imbalance as a conserved longevity mechanism. *Nature*. 2013;497(7450):451-7. doi:  
610 10.1038/nature12188. PubMed PMID: 23698443; PubMed Central PMCID: PMC3663447.
- 611 12. Bennett CF, Kaerberlein M. The mitochondrial unfolded protein response and increased  
612 longevity: Cause, consequence, or correlation? *Experimental gerontology*. 2014. doi:  
613 10.1016/j.exger.2014.02.002. PubMed PMID: 24518875.
- 614 13. Bennett CF, Vander Wende H, Simko M, Klum S, Barfield S, Choi H, et al. Activation of the  
615 mitochondrial unfolded protein response does not predict longevity in *Caenorhabditis elegans*. *Nature*  
616 *communications*. 2014;5:3483. doi: 10.1038/ncomms4483. PubMed PMID: 24662282.
- 617 14. Pellegrino MW, Nargund AM, Kirienko NV, Gillis R, Fiorese CJ, Haynes CM. Mitochondrial UPR-  
618 regulated innate immunity provides resistance to pathogen infection. *Nature*. 2014;516(7531):414-7.  
619 doi: 10.1038/nature13818. PubMed PMID: 25274306; PubMed Central PMCID: PMC4270954.
- 620 15. Pena S, Sherman T, Brookes PS, Nehrke K. The Mitochondrial Unfolded Protein Response  
621 Protects against Anoxia in *Caenorhabditis elegans*. *PLoS One*. 2016;11(7):e0159989. doi:  
622 10.1371/journal.pone.0159989. PubMed PMID: 27459203; PubMed Central PMCID: PMC4961406.



- 623 16. Rauthan M, Ranji P, Aguilera Pradenas N, Pitot C, Pilon M. The mitochondrial unfolded protein  
624 response activator ATFS-1 protects cells from inhibition of the mevalonate pathway. *Proc Natl Acad Sci*  
625 *U S A*. 2013;110(15):5981-6. doi: 10.1073/pnas.1218778110. PubMed PMID: 23530189; PubMed Central  
626 PMCID: PMC3625262.
- 627 17. Shen X, Ellis RE, Sakaki K, Kaufman RJ. Genetic interactions due to constitutive and inducible  
628 gene regulation mediated by the unfolded protein response in *C. elegans*. *PLoS Genet*. 2005;1(3):e37.  
629 Epub 2005/09/27. doi: 10.1371/journal.pgen.0010037. PubMed PMID: 16184190; PubMed Central  
630 PMCID: PMCPMC1231716.
- 631 18. Li J, Chauve L, Phelps G, Brielmann RM, Morimoto RI. E2F coregulates an essential HSF  
632 developmental program that is distinct from the heat-shock response. *Genes Dev*. 2016;30(18):2062-75.  
633 Epub 2016/11/01. doi: 10.1101/gad.283317.116. PubMed PMID: 27688402; PubMed Central PMCID:  
634 PMCPMC5066613.
- 635 19. Sural S, Lu TC, Jung SA, Hsu AL. HSB-1 Inhibition and HSF-1 Overexpression Trigger Overlapping  
636 Transcriptional Changes To Promote Longevity in *Caenorhabditis elegans*. *G3 (Bethesda)*.  
637 2019;9(5):1679-92. Epub 2019/03/22. doi: 10.1534/g3.119.400044. PubMed PMID: 30894454; PubMed  
638 Central PMCID: PMCPMC6505166.
- 639 20. Tepper RG, Ashraf J, Kaletsky R, Kleemann G, Murphy CT, Bussemaker HJ. PQM-1 Complements  
640 DAF-16 as a Key Transcriptional Regulator of DAF-2-Mediated Development and Longevity. *Cell*.  
641 2013;154(3):676-90. doi: 10.1016/j.cell.2013.07.006. PubMed PMID: 23911329.
- 642 21. Steinbaugh MJ, Narasimhan SD, Robida-Stubbs S, Moronetti Mazzeo LE, Dreyfuss JM, Hourihan  
643 JM, et al. Lipid-mediated regulation of SKN-1/Nrf in response to germ cell absence. *eLife*. 2015;4. doi:  
644 10.7554/eLife.07836. PubMed PMID: 26196144.
- 645 22. Ewald CY, Landis JN, Porter Abate J, Murphy CT, Blackwell TK. Dauer-independent insulin/IGF-1-  
646 signalling implicates collagen remodelling in longevity. *Nature*. 2015;519(7541):97-101. Epub  
647 2014/12/18. doi: 10.1038/nature14021. PubMed PMID: 25517099; PubMed Central PMCID:  
648 PMCPMC4352135.
- 649 23. Shen C, Nettleton D, Jiang M, Kim SK, Powell-Coffman JA. Roles of the HIF-1 hypoxia-inducible  
650 factor during hypoxia response in *Caenorhabditis elegans*. *J Biol Chem*. 2005;280(21):20580-8. Epub  
651 2005/03/23. doi: 10.1074/jbc.M501894200. PubMed PMID: 15781453.
- 652 24. Fletcher M, Tillman EJ, Butty VL, Levine SS, Kim DH. Global transcriptional regulation of innate  
653 immunity by ATF-7 in *C. elegans*. *PLoS Genet*. 2019;15(2):e1007830. Epub 2019/02/23. doi:  
654 10.1371/journal.pgen.1007830. PubMed PMID: 30789901; PubMed Central PMCID: PMCPMC6400416.
- 655 25. Kirienko NV, Cezairliyan BO, Ausubel FM, Powell JR. *Pseudomonas aeruginosa* PA14  
656 pathogenesis in *Caenorhabditis elegans*. *Methods Mol Biol*. 2014;1149:653-69. doi: 10.1007/978-1-  
657 4939-0473-0\_50. PubMed PMID: 24818940.
- 658 26. Dues DJ, Andrews EK, Schaar CE, Bergsma AL, Senchuk MM, Van Raamsdonk JM. Aging causes  
659 decreased resistance to multiple stresses and a failure to activate specific stress response pathways.  
660 *Aging (Albany NY)*. 2016;8(4):777-95. doi: 10.18632/aging.100939. PubMed PMID: 27053445; PubMed  
661 Central PMCID: PMC4925828.
- 662 27. Wu Z, Isik M, Moroz N, Steinbaugh MJ, Zhang P, Blackwell TK. Dietary Restriction Extends  
663 Lifespan through Metabolic Regulation of Innate Immunity. *Cell Metab*. 2019;29(5):1192-205 e8. Epub  
664 2019/03/25. doi: 10.1016/j.cmet.2019.02.013. PubMed PMID: 30905669; PubMed Central PMCID:  
665 PMCPMC6506407.
- 666 28. Lakowski B, Hekimi S. Determination of Life-Span in *Caenorhabditis elegans* by Four Clock Genes.  
667 *Science*. 1996;272:1010-3.
- 668 29. Feng J, Bussiere F, Hekimi S. Mitochondrial Electron Transport Is a Key Determinant of Life Span  
669 in *Caenorhabditis elegans*. *Developmental Cell*. 2001;1:633-64.

- 670 30. Van Raamsdonk JM, Hekimi S. Deletion of the mitochondrial superoxide dismutase sod-2  
671 extends lifespan in *Caenorhabditis elegans*. *PLoS Genet*. 2009;5(2):e1000361. doi:  
672 10.1371/journal.pgen.1000361. PubMed PMID: 19197346; PubMed Central PMCID: PMC2628729.
- 673 31. Kenyon C, Chang J, Gensch E, Rudner A, Tabtlang R. A *C. elegans* mutant that lives twice as long  
674 as wild type. *Nature*. 1993;366:461-4.
- 675 32. Hsin H, Kenyon C. Signals from the reproductive system regulate the lifespan of *C. elegans*.  
676 *Nature*. 1999;399:362-6.
- 677 33. Hansen M, Taubert S, Crawford D, Libina N, Lee SJ, Kenyon C. Lifespan extension by conditions  
678 that inhibit translation in *Caenorhabditis elegans*. *Aging Cell*. 2007;6(1):95-110. Epub 2007/02/03. doi:  
679 10.1111/j.1474-9726.2006.00267.x. PubMed PMID: 17266679.
- 680 34. Apfeld J, Kenyon C. Regulation of lifespan by sensory perception in *Caenorhabditis elegans*.  
681 *Nature*. 1999;804-9.
- 682 35. Lakowski B, Hekimi S. The genetics of caloric restriction in *Caenorhabditis elegans*. *Proc Natl*  
683 *Acad Sci USA*. 1998;95:13091-6.
- 684 36. Dillin A, Hsu A, Arantes-Oliveira N, Lehrer-Graiwer J, Hsin H, Fraser A, et al. Rates of Behavior  
685 and Aging Specified by Mitochondrial  
686 Function During Development. *Science*. 2002;298:2398-401.
- 687 37. Yoneda T, Benedetti C, Urano F, Clark SG, Harding HP, Ron D. Compartment-specific  
688 perturbation of protein handling activates genes encoding mitochondrial chaperones. *Journal of cell*  
689 *science*. 2004;117(Pt 18):4055-66. doi: 10.1242/jcs.01275. PubMed PMID: 15280428.
- 690 38. Runkel ED, Baumeister R, Schulze E. Mitochondrial stress: Balancing friend and foe.  
691 *Experimental gerontology*. 2014. doi: 10.1016/j.exger.2014.02.013. PubMed PMID: 24603155.
- 692 39. Ito A, Zhao Q, Tanaka Y, Yasui M, Katayama R, Sun S, et al. Metolazone upregulates  
693 mitochondrial chaperones and extends lifespan in *Caenorhabditis elegans*. *Biogerontology*.  
694 2021;22(1):119-31. doi: 10.1007/s10522-020-09907-6. PubMed PMID: 33216250.
- 695 40. Tian Y, Garcia G, Bian Q, Steffen KK, Joe L, Wolff S, et al. Mitochondrial Stress Induces Chromatin  
696 Reorganization to Promote Longevity and UPR(mt). *Cell*. 2016;165(5):1197-208. doi:  
697 10.1016/j.cell.2016.04.011. PubMed PMID: 27133166; PubMed Central PMCID: PMC4889216.
- 698 41. Baker BM, Nargund AM, Sun T, Haynes CM. Protective coupling of mitochondrial function and  
699 protein synthesis via the eIF2 $\alpha$  kinase GCN-2. *PLoS Genet*. 2012;8(6):e1002760. doi:  
700 10.1371/journal.pgen.1002760. PubMed PMID: 22719267; PubMed Central PMCID: PMC3375257.
- 701 42. Lin YF, Schulz AM, Pellegrino MW, Lu Y, Shaham S, Haynes CM. Maintenance and propagation of  
702 a deleterious mitochondrial genome by the mitochondrial unfolded protein response. *Nature*. 2016. doi:  
703 10.1038/nature17989. PubMed PMID: 27135930.
- 704 43. Jeong DE, Lee D, Hwang SY, Lee Y, Lee JE, Seo M, et al. Mitochondrial chaperone HSP-60  
705 regulates anti-bacterial immunity via p38 MAP kinase signaling. *The EMBO journal*. 2017;36(8):1046-65.  
706 doi: 10.15252/embj.201694781. PubMed PMID: 28283579; PubMed Central PMCID: PMC4889216.
- 707 44. Yokoyama K, Fukumoto K, Murakami T, Harada S, Hosono R, Wadhwa R, et al. Extended  
708 longevity of *Caenorhabditis elegans* by knocking in extra copies of hsp70F, a homolog of mot-2  
709 (mortalin)/mthsp70/Grp75. *FEBS letters*. 2002;516(1-3):53-7. doi: 10.1016/s0014-5793(02)02470-5.  
710 PubMed PMID: 11959102.
- 711 45. Mao K, Ji F, Breen P, Sewell A, Han M, Sadreyev R, et al. Mitochondrial Dysfunction in *C. elegans*  
712 Activates Mitochondrial Relocalization and Nuclear Hormone Receptor-Dependent Detoxification Genes.  
713 *Cell metabolism*. 2019;29(5):1182-91 e4. doi: 10.1016/j.cmet.2019.01.022. PubMed PMID: 30799287;  
714 PubMed Central PMCID: PMC6506380.
- 715 46. Cooper JF, Machiela E, Dues DJ, Spielbauer KK, Senchuk MM, Van Raamsdonk JM. Activation of  
716 the mitochondrial unfolded protein response promotes longevity and dopamine neuron survival in

- 717 Parkinson's disease models. *Scientific reports*. 2017;7(1):16441. doi: 10.1038/s41598-017-16637-2.  
718 PubMed PMID: 29180793; PubMed Central PMCID: PMC5703891.
- 719 47. Kim HE, Grant AR, Simic MS, Kohnz RA, Nomura DK, Durieux J, et al. Lipid Biosynthesis  
720 Coordinates a Mitochondrial-to-Cytosolic Stress Response. *Cell*. 2016;166(6):1539-52 e16. doi:  
721 10.1016/j.cell.2016.08.027. PubMed PMID: 27610574.
- 722 48. Schaar CE, Dues DJ, Spielbauer KK, Machiela E, Cooper JF, Senchuk M, et al. Mitochondrial and  
723 cytoplasmic ROS have opposing effects on lifespan. *PLoS Genet*. 2015;11(2):e1004972. doi:  
724 10.1371/journal.pgen.1004972. PubMed PMID: 25671321; PubMed Central PMCID: PMC4335496.
- 725 49. Machiela E, Dues DJ, Senchuk MM, Van Raamsdonk JM. Oxidative stress is increased in *C.*  
726 *elegans* models of Huntington's disease but does not contribute to polyglutamine toxicity phenotypes.  
727 *Neurobiology of disease*. 2016;96:1-11. doi: 10.1016/j.nbd.2016.08.008. PubMed PMID: 27544481.
- 728 50. Dues DJ, Schaar CE, Johnson BK, Bowman MJ, Winn ME, Senchuk MM, et al. Uncoupling of  
729 oxidative stress resistance and lifespan in long-lived *isp-1* mitochondrial mutants in *Caenorhabditis*  
730 *elegans*. *Free radical biology & medicine*. 2017;108:362-73. doi: 10.1016/j.freeradbiomed.2017.04.004.  
731 PubMed PMID: 28392283.
- 732 51. Senchuk MM, Dues DJ, Schaar CE, Johnson BK, Madaj ZB, Bowman MJ, et al. Activation of DAF-  
733 16/FOXO by reactive oxygen species contributes to longevity in long-lived mitochondrial mutants in  
734 *Caenorhabditis elegans*. *PLoS Genet*. 2018;14(3):e1007268. doi: 10.1371/journal.pgen.1007268.  
735 PubMed PMID: 29522556; PubMed Central PMCID: PMC5862515.
- 736 52. Dobin A, Davis CA, Schlesinger F, Drenkow J, Zaleski C, Jha S, et al. STAR: ultrafast universal RNA-  
737 seq aligner. *Bioinformatics*. 2013;29(1):15-21. doi: 10.1093/bioinformatics/bts635. PubMed PMID:  
738 23104886; PubMed Central PMCID: PMC3530905.
- 739 53. Patro R, Duggal G, Love MI, Irizarry RA, Kingsford C. Salmon provides fast and bias-aware  
740 quantification of transcript expression. *Nat Methods*. 2017;14(4):417-9. Epub 2017/03/07. doi:  
741 10.1038/nmeth.4197. PubMed PMID: 28263959; PubMed Central PMCID: PMC5600148.
- 742 54. Sonesson C, Love MI, Robinson MD. Differential analyses for RNA-seq: transcript-level estimates  
743 improve gene-level inferences. *F1000Res*. 2015;4:1521. Epub 2016/03/01. doi:  
744 10.12688/f1000research.7563.2. PubMed PMID: 26925227; PubMed Central PMCID: PMC54712774.
- 745 55. Love MI, Huber W, Anders S. Moderated estimation of fold change and dispersion for RNA-seq  
746 data with DESeq2. *Genome Biol*. 2014;15(12):550. Epub 2014/12/18. doi: 10.1186/s13059-014-0550-8.  
747 PubMed PMID: 25516281; PubMed Central PMCID: PMC4302049.
- 748 56. Van Raamsdonk JM, Hekimi S. FUDR causes a twofold increase in the lifespan of the  
749 mitochondrial mutant *gas-1*. *Mech Ageing Dev*. 2011;132(10):519-21. doi: 10.1016/j.mad.2011.08.006.  
750 PubMed PMID: 21893079.

751

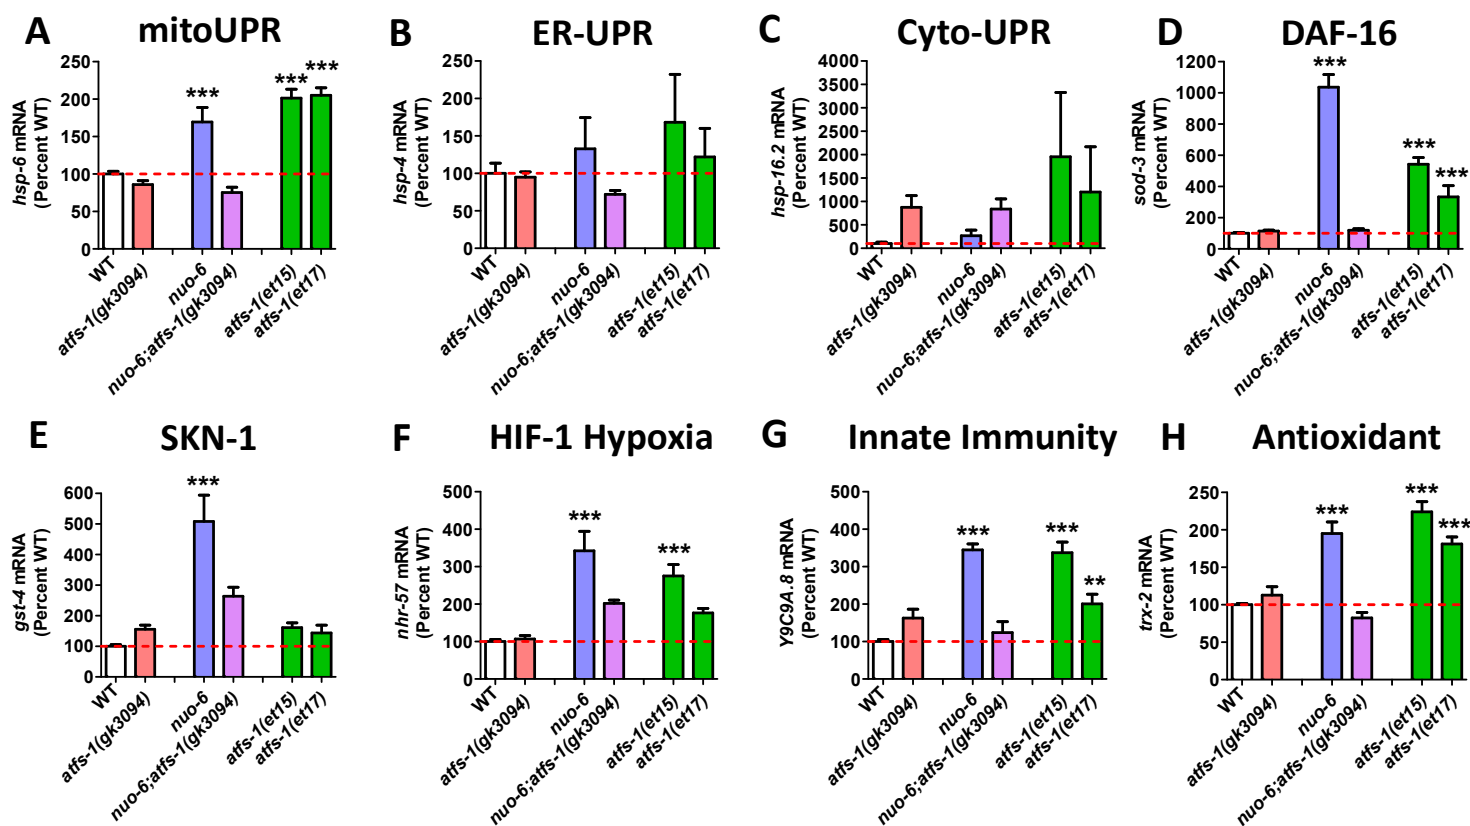

**Figure 1. Activation of ATFS-1 upregulates genes from multiple stress response pathways.** To determine the role of ATFS-1 in the activation of genes from different stress response pathways, we activated ATFS-1 by mildly impairing mitochondrial function through a mutation in *nuo-6* (blue bars) and then examined the effect of disrupting *atfs-1* using an *atfs-1* deletion mutant *atfs-1(gk3094)* (purple bars). We also examined the expression of these genes in two constitutively active *atfs-1* mutants, *atfs-1(et15)* and *atfs-1(et17)* (green bars). Target genes from the mitochondrial unfolded protein response (mitoUPR) (A, *hsp-6*), DAF-16-mediated stress response (D, *sod-3*), SKN-1-mediated oxidative stress response (E, *gst-4*), HIF-1-mediated hypoxia response (F, *nhr-57*), p38-mediated innate immune pathway (G, *Y9C9A.8*), and antioxidant defense (H, *trx-2*) are all significantly upregulated in *nuo-6* mutants in an ATFS-1-dependent manner. Target genes from the mitoUPR, DAF-16-mediated stress response, HIF-1-mediated hypoxia response, p38-mediated innate immune pathway and antioxidant defense are also upregulated in constitutive activation of ATFS-1 (A, D, F, G, H). In contrast, activation of ATFS-1 by *nuo-6* mutation or *atfs-1* gain-of-function mutations did not significantly affect target gene expression for the endoplasmic reticulum unfolded protein response (B, ER-UPR, *hsp-4*) or the cytoplasmic unfolded protein response (C, Cyto-UPR, *hsp-16.2*). *atfs-1(gk3094)* is a loss-of-function deletion mutant. *atfs-1(et15)* and *atfs-1(et17)* are constitutively active gain-of-function mutants. Error bars indicate SEM. \*\* $p < 0.01$ , \*\*\* $p < 0.001$ . A full list of genes that are upregulated by ATFS-1 activation can be found in **Table S2**.

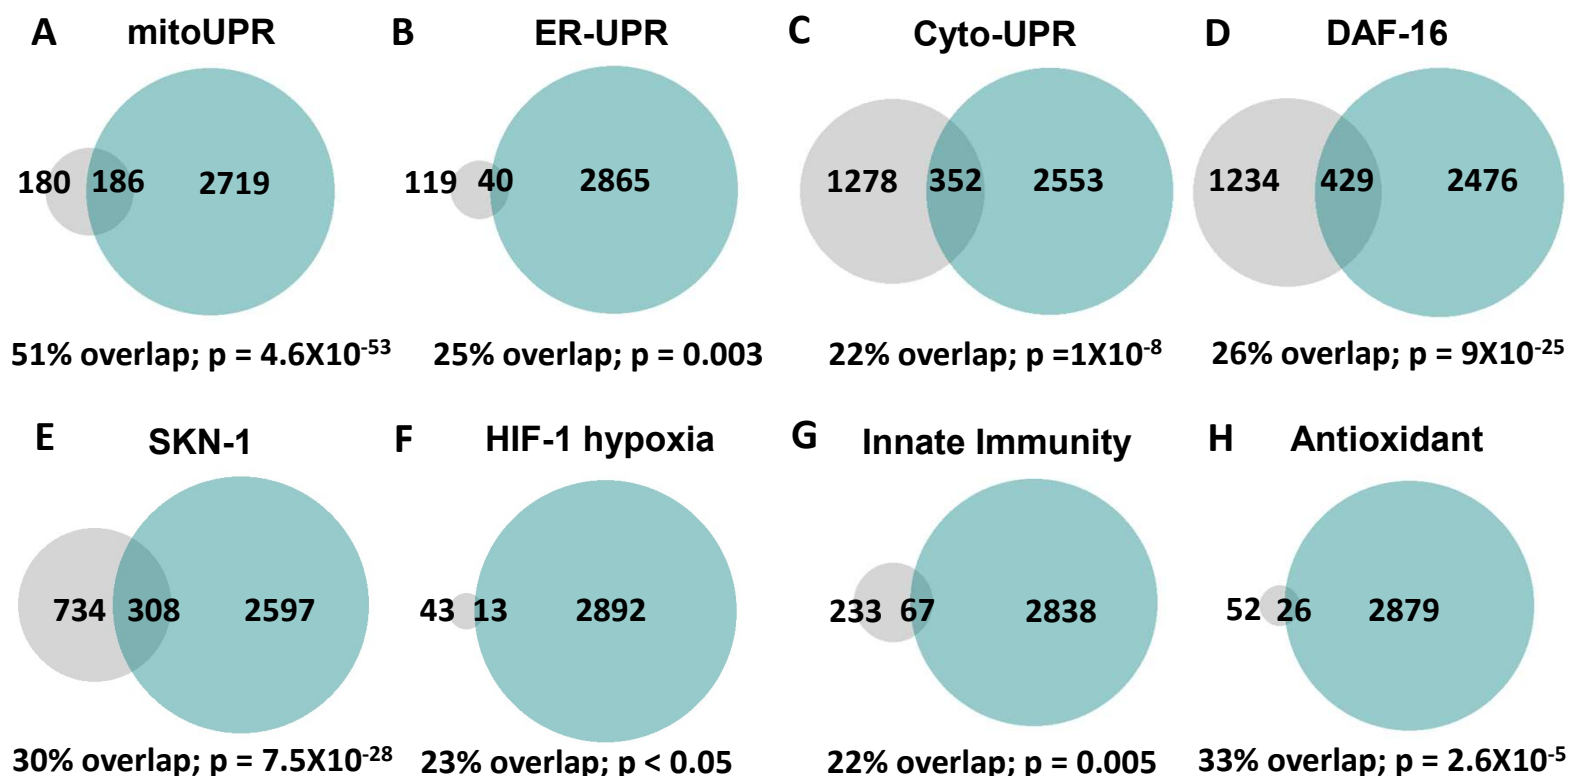

**Figure 2. Constitutive activation of ATFS-1 results in upregulation of genes from multiple stress response pathways.** Genes that are upregulated by activation of ATFS-1 were compared to previous published lists of genes involved in different stress response pathways, including the mitochondrial unfolded protein response (A, mitoUPR), the endoplasmic reticulum unfolded protein response (B, ER-UPR), the cytoplasmic unfolded protein response (C, Cyto-UPR), the DAF-16-mediated stress response (D), the SKN-1-mediated oxidative stress response (E), the HIF-1-mediated hypoxia response (F), the p38-mediated innate immune response (G), and antioxidant genes (H). In every case, there was a significant degree of overlap ranging from 22%-51%. Grey circles indicate genes that are upregulated by activation of the stress response pathway indicated. Turquoise circles indicate genes that are upregulated in the *atfs-1(et15)* constitutively active gain-of-function mutant. The numbers inside the circles show how many genes are upregulated. The percentage overlap is the number of overlapping genes as a percentage of the number of genes upregulated by the stress response pathway. mitoUPR = mitochondrial unfolded protein response. ER-UPR = endoplasmic reticulum unfolded protein response. Cyto-UPR = cytoplasmic unfolded protein response. DAF-16 = DAF-16-mediated stress response pathway. SKN-1 = SKN-1-mediated oxidative stress response pathway. HIF-1 = HIF-1-mediated stress response pathway. Innate immunity = p38-mediated innate immunity pathway. Antioxidant = antioxidant genes. Stress pathway gene lists and sources can be found in **Table S3**.

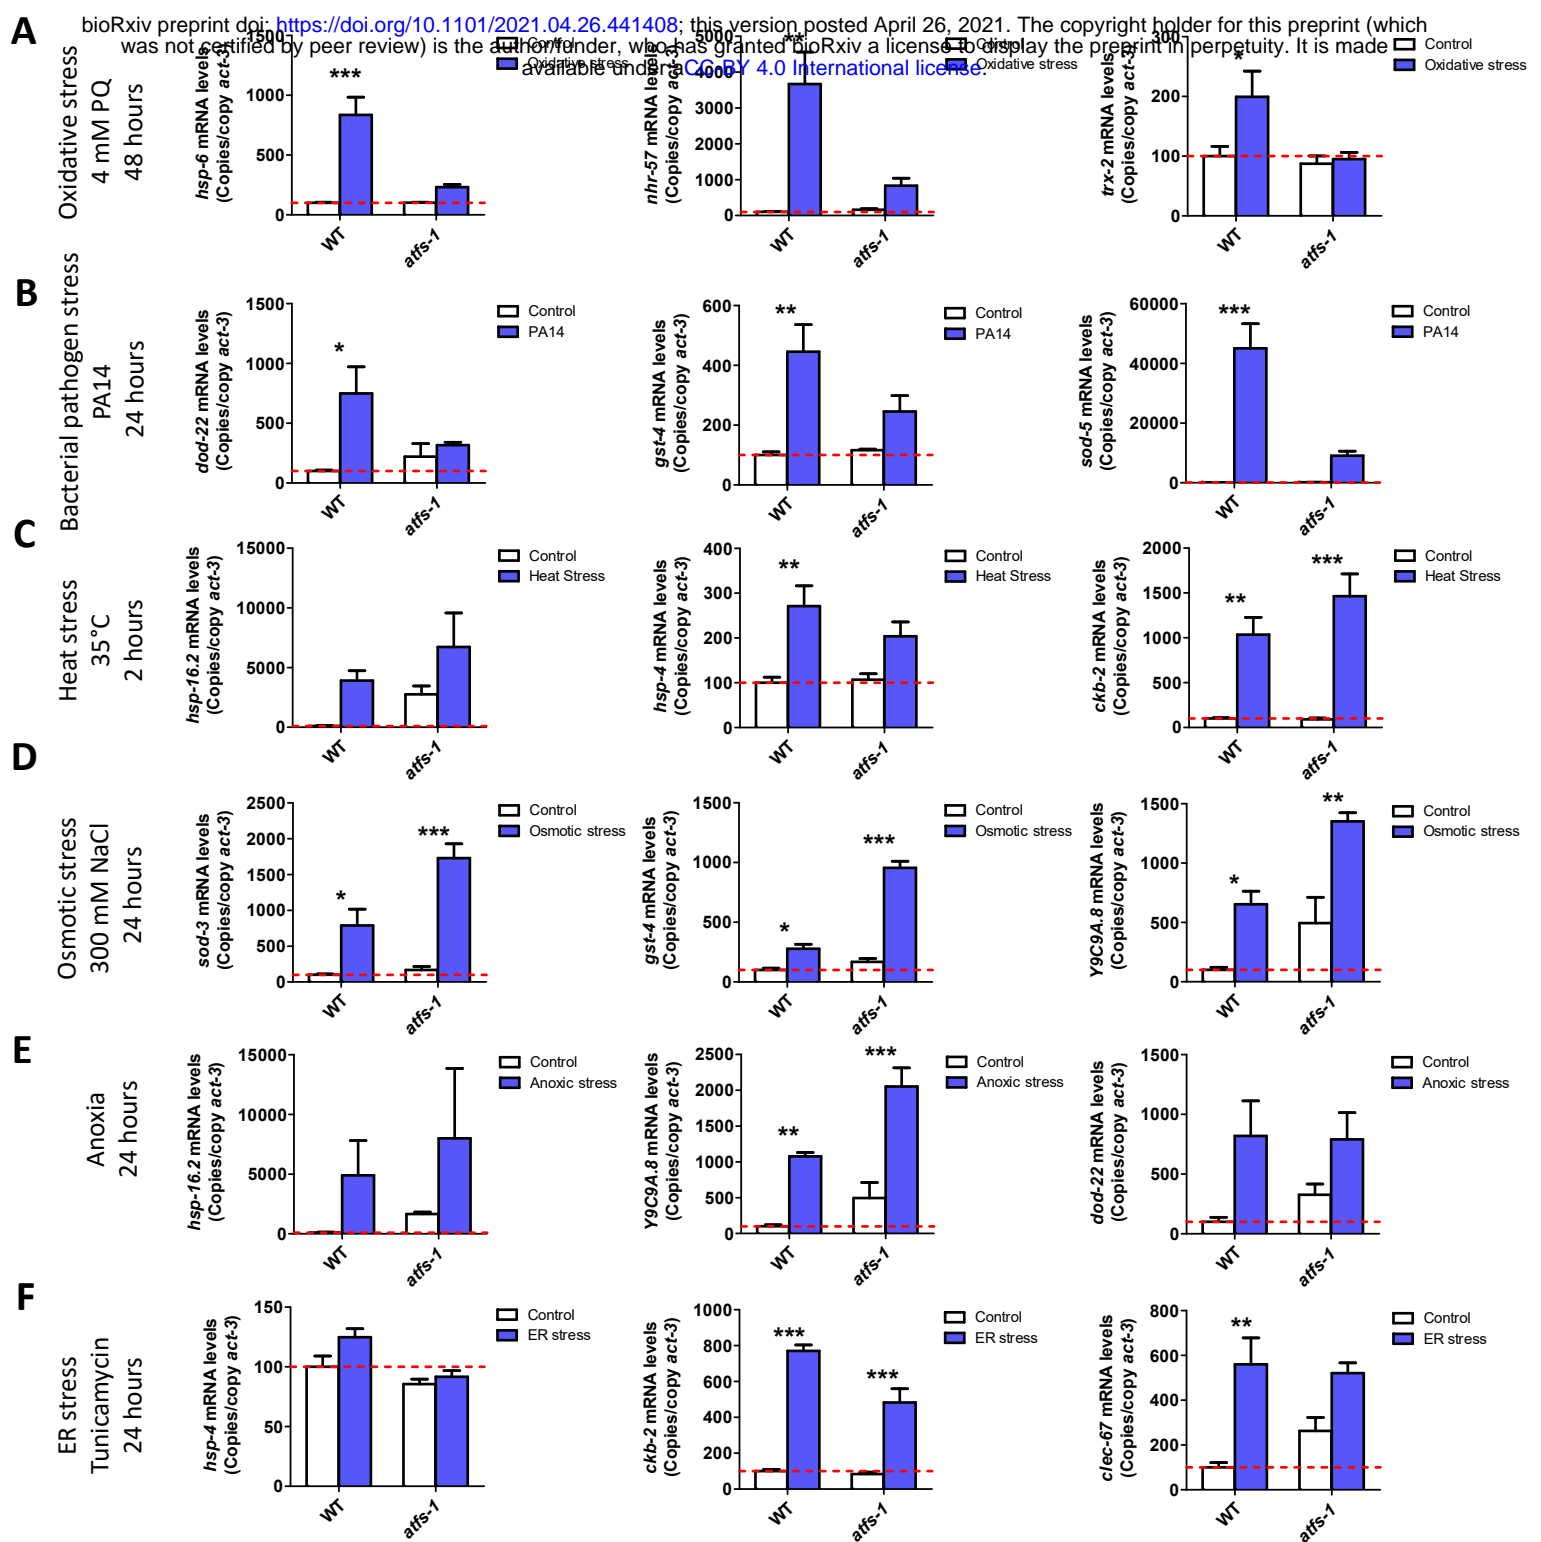

**Figure 3. ATFS-1 is required for upregulation of stress response genes after exposure to oxidative stress or bacterial pathogen stress.** To determine the role of ATFS-1 in responding to different types of stress, we compared the upregulation of stress response genes in wild-type and *atfs-1(gk3094)* loss-of-function deletion mutants after exposure to different stressors. **A.** Exposure to oxidative stress (4 mM paraquat, 48 hours) caused a significant upregulation of *hsp-6*, *nhr-57* and *trx-2* in wild-type worms that was prevented by the disruption of *atfs-1*. **B.** Exposure to bacterial pathogen stress (PA14, 24 hours) resulted in an upregulation of *dod-22*, *gst-4* and *sod-5* in wild-type worms that was prevented by the *atfs-1* deletion. **C.** Exposure to heat stress (35°C, 2 hours) increased the expression of *hsp-16.2*, *hsp-4* and *ckb-2* in both wild-type and *atfs-1* worms. **D.** Exposure to osmotic stress (300 mM, 24 hours) caused an upregulation of *sod-3*, *gst-4* and *Y9C9A.8* in wild-type worms and to a greater magnitude in *atfs-1* mutants. **E.** Anoxia (24 hours) resulted in the upregulation of *hsp-16.2*, *Y9C9A.8* and *dod-22* in both wild-type and *atfs-1* worms. **F.** Exposing worms to endoplasmic reticulum stress (tunicamycin, 24 hours) increased the expression of *ckb-2* and *clec-67* in both wild-type and *atfs-1* worms. Error bars indicate SEM. \* $p < 0.05$ , \*\* $p < 0.01$ , \*\*\* $p < 0.001$ .

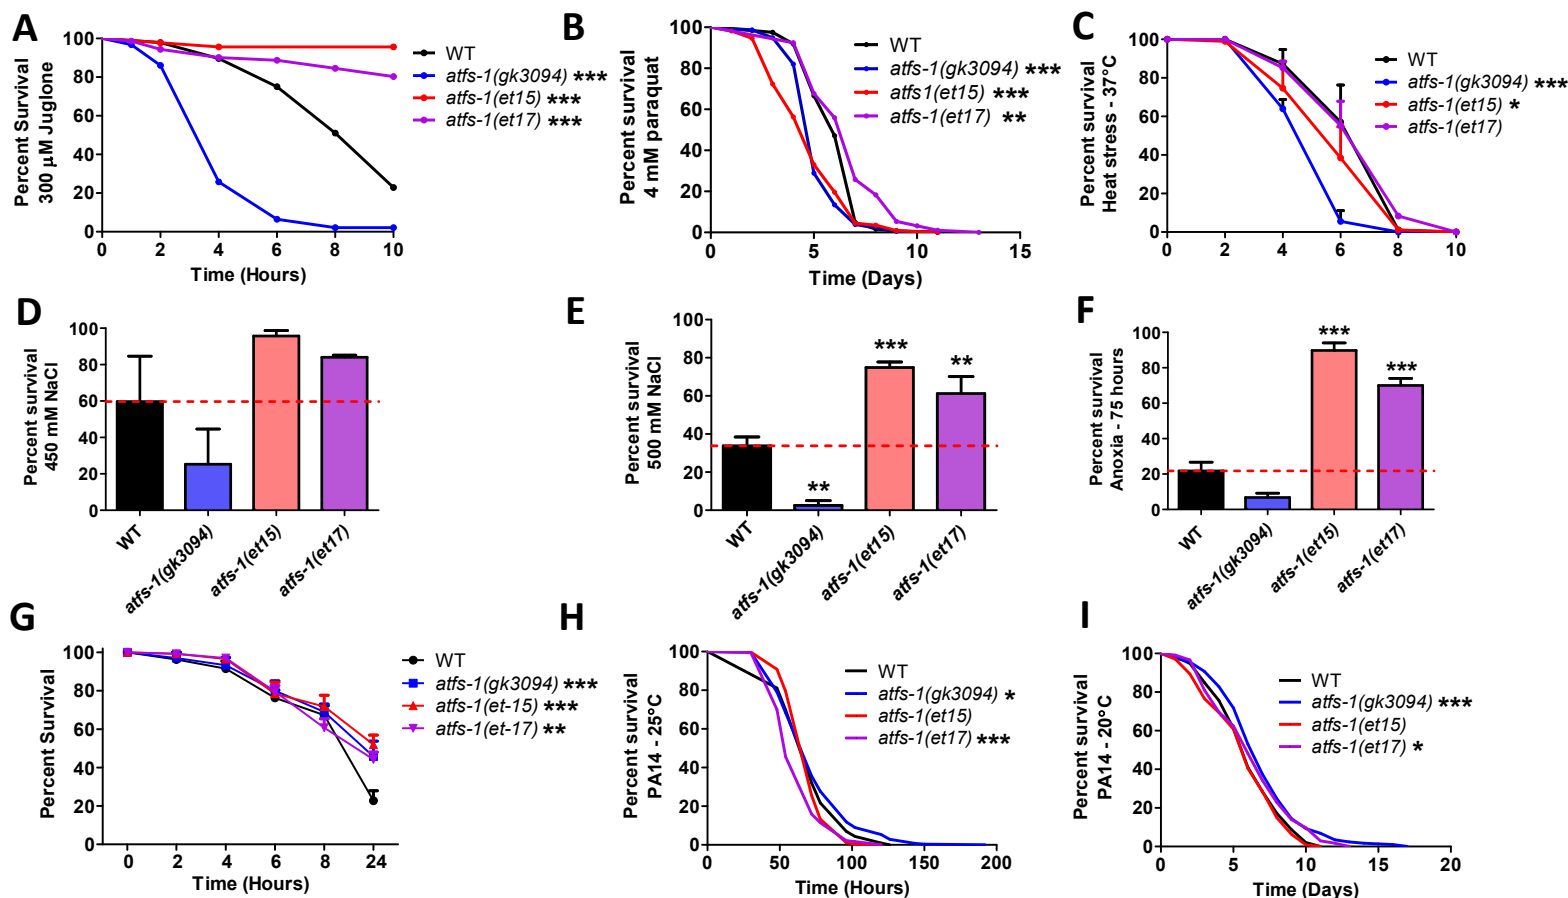

**Figure 4. Constitutive activation of ATFS-1 increases resistance to multiple external stressors.** To determine the role of ATFS-1 in resistance to stress, the stress resistance of an *atfs-1* loss-of-function mutants (*atfs-1(gk3094)*) and two constitutively active *atfs-1* gain-of-function mutants (*atfs-1(et15)*, *atfs-1(et17)*) was compared to wild-type worms. **A.** Activation of ATFS-1 enhanced resistance to acute oxidative stress (300  $\mu$ M juglone), while deletion of *atfs-1* markedly decreased resistance to acute oxidative stress. **B.** Disruption of *atfs-1* decreased resistance to chronic oxidative stress (4 mM paraquat). *atfs-1(et17)* mutants showed increased resistance to chronic oxidative stress, while *atfs-1(et15)* mutants had decreased resistance. **C.** Resistance to heat stress (37°C) was not enhanced by activation of ATFS-1, while deletion of *atfs-1* decreased heat stress resistance. **D,E.** Activation of ATFS-1 increased resistance to osmotic stress (450 mM, 500 mM NaCl), while disruption of *atfs-1* decreased osmotic stress resistance. **F.** Constitutively active *atfs-1* mutants show increased resistance to anoxia (75 hours), while *atfs-1* deletion mutants exhibit a trend towards decreased anoxia resistance. **G.** Activation of ATFS-1 increased resistance to *P. aeruginosa* toxin in a fast kill assay. A slow kill assay in which worms die from internal accumulation of *P. aeruginosa* was performed according to two established protocols. **H.** At 25°C, *atfs-1(et17)* mutants showed a small decrease in resistance to bacterial pathogens (PA14), while *atfs-1(gk3094)* mutants showed a small increase in resistance. **I.** At 20°C, both *atfs-1(et17)* and *atfs-1(gk3094)* mutants exhibited a small increase in resistance to bacterial pathogens. Error bars indicate SEM. \* $p < 0.05$ , \*\* $p < 0.01$ , \*\*\* $p < 0.001$ .

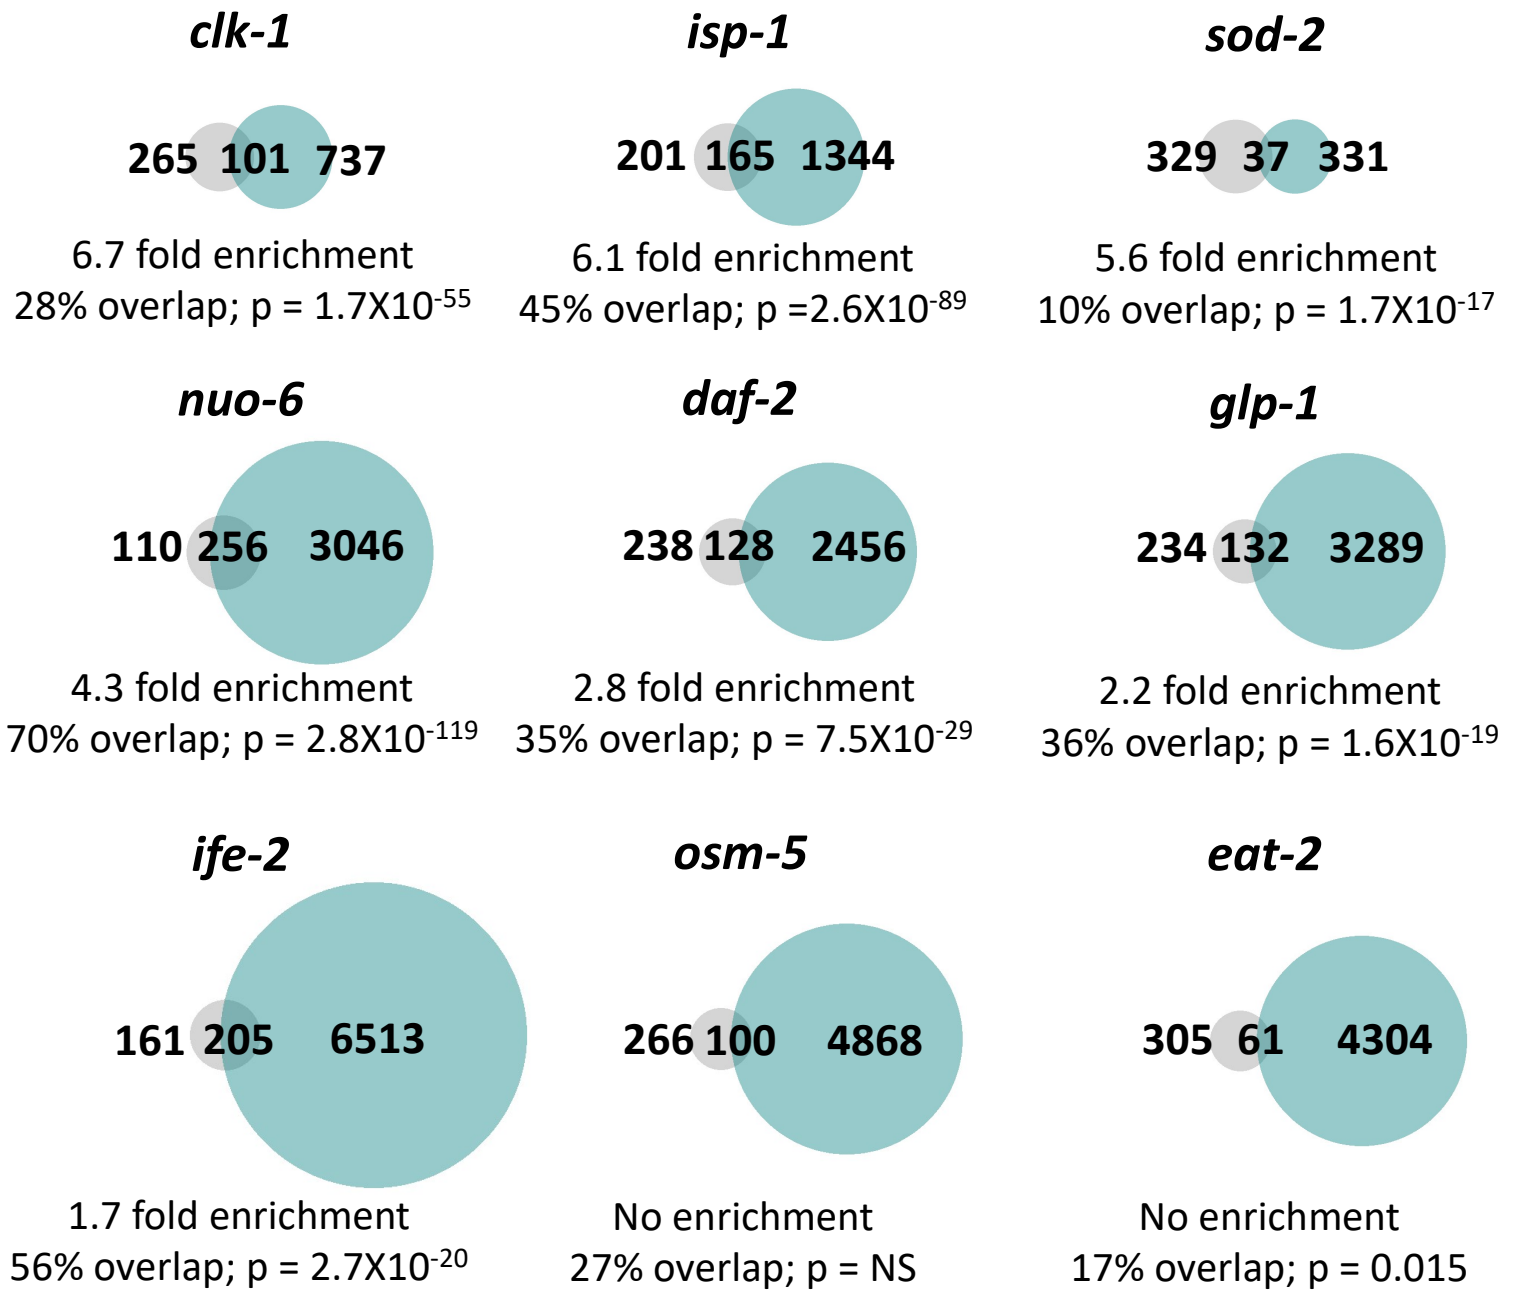

**Figure 5. Multiple long-lived mutants from different pathways of lifespan extension show upregulation of ATFS-1-dependent genes.** To determine the extent to which long-lived genetic mutants from different pathways of lifespan extension show differential expression of ATFS-1 target genes, we compared genes that are upregulated in nine different long-lived mutants to a published list of *spg-7* RNAi-upregulated, ATFS-1-dependent target genes (Nargund *et al.*, 2012). We found that *clk-1*, *isp-1*, *nuo-6*, *sod-2*, *daf-2*, *glp-1* and *ife-2* worms all show a highly significant degree of overlap with genes upregulated by *spg-7* RNAi in an ATFS-1-dependent manner. The grey circles represent the 366 genes that are upregulated by *spg-7* RNAi in an ATFS-1 dependent manner. Turquoise circles are genes that are significantly upregulated in the long-lived mutant indicated as determined from our RNA sequencing data. The number of unique and overlapping genes are indicated. Overlap is calculated as the number of genes in common between the two gene sets divided by the total number of genes that are upregulated by *spg-7* RNAi in an ATFS-1 dependent manner. Enrichment is calculated as the number of overlapping genes observed divided by the number of overlapping genes predicted if genes were chosen randomly.



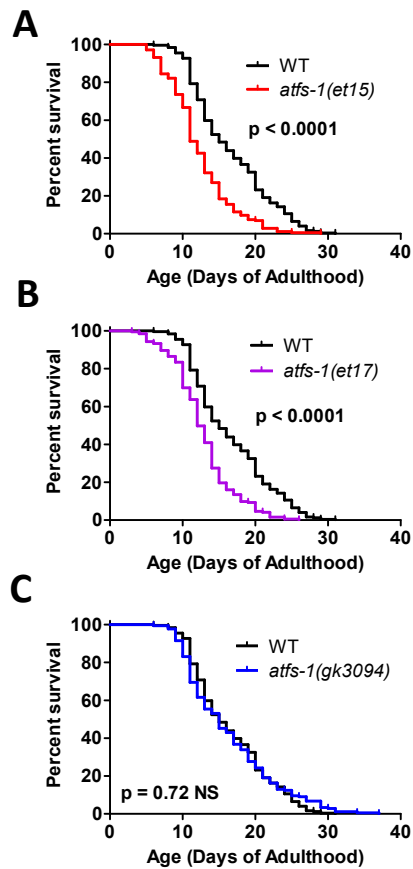

**Figure 6. Activation of ATFS-1 does not increase lifespan.** To determine the effect of ATFS-1 on aging, we quantified the lifespan of an *atfs-1* deletion mutant and two constitutively active *atfs-1* mutants. **A,B.** Both constitutively active *atfs-1* mutants, *et15* and *et17*, have a significantly decreased lifespan compared to wild-type worms. **C.** Deletion of *atfs-1* does not affect lifespan compared to wild-type worms. *atfs-1(gk3094)* is a loss of function mutant resulting from a deletion. *atfs-1(et15)* and *atfs-1(et17)* are constitutively active gain-of-function mutants.

Supplementary Figures for:

## **Mitochondrial unfolded protein response transcription factor ATFS-1 increases resistance to exogenous stressors through upregulation of multiple stress response pathways**

Sonja K. Soo<sup>1,2</sup>, Annika Traa<sup>1,2</sup>, Meeta Mistry<sup>3</sup>, Jeremy M. Van Raamsdonk<sup>1,2,4,5</sup>

<sup>1</sup>Department of Neurology and Neurosurgery, McGill University, Montreal, Quebec, Canada

<sup>2</sup>Metabolic Disorders and Complications Program, and Brain Repair and Integrative Neuroscience Program, Research Institute of the McGill University Health Centre, Montreal, Quebec, Canada

<sup>3</sup>Bioinformatics Core, Harvard School of Public Health, Harvard Medical School, Boston, MA, USA

<sup>4</sup>Division of Experimental Medicine, Department of Medicine, McGill University, Montreal, Quebec, Canada

<sup>5</sup>Department of Genetics, Harvard Medical School, Boston, MA, USA

*isp-1*

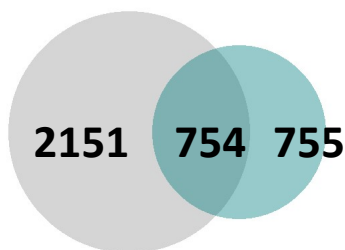

3.5 fold enrichment  
50% overlap;  $p = 8.9 \times 10^{-267}$

*clk-1*

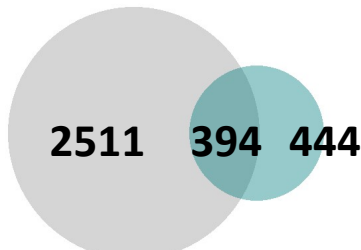

3.3 fold enrichment  
47% overlap;  $p = 2.5 \times 10^{-121}$

*sod-2*

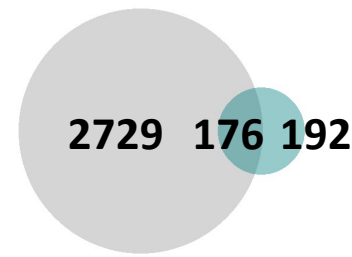

3.4 fold enrichment  
48% overlap;  $p = 7.6 \times 10^{-55}$

*nuo-6*

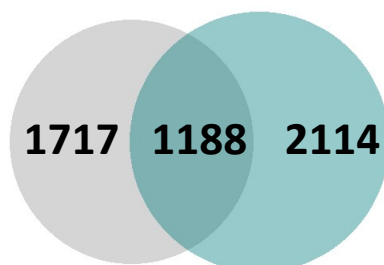

2.5 fold enrichment  
41% overlap;  $p = 1.6 \times 10^{-272}$

*daf-2*

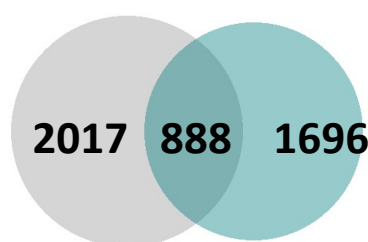

2.4 fold enrichment  
34% overlap;  $p = 6.3 \times 10^{-175}$

*glp-1*

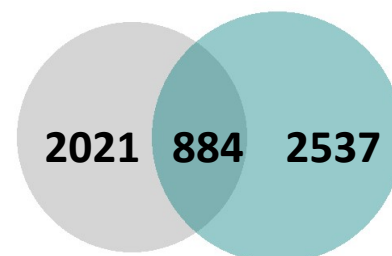

1.8 fold enrichment  
30% overlap;  $p = 3.1 \times 10^{-89}$

*ife-2*

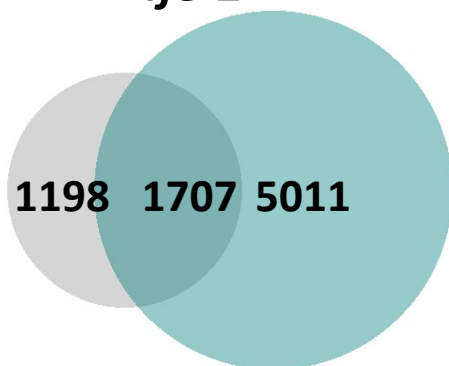

1.8 fold enrichment  
59% overlap;  $p = 4.9 \times 10^{-213}$

*eat-2*

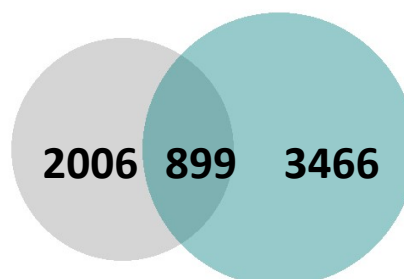

1.5 fold enrichment  
31% overlap;  $p = 4.2 \times 10^{-40}$

*osm-5*

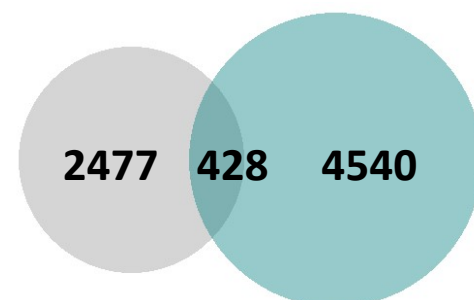

No enrichment  
15% overlap;  $p = 2.8 \times 10^{-82}$

**Figure S1. Multiple long-lived mutants from different pathways of lifespan extension show upregulation of ATFS-1-dependent genes.** To determine the extent to which long-lived genetic mutants from different pathways of lifespan extension show differential expression of ATFS-1 target genes, we compared genes that are upregulated in nine different long-lived mutants to genes upregulated in a constitutively active *atfs-1* mutant (*et15*). All of the long-lived mutant worms, except for *osm-5*, show a highly significant degree of overlap with the constitutively active *atfs-1* mutant. The grey circles represent genes that are significantly upregulated in the constitutively active *atfs-1(et15)* mutant. Turquoise circles are genes that are significantly upregulated in the long-lived mutant indicated. The number of unique and overlapping genes are indicated. Overlap is calculated as the number of genes in common between the two gene sets divided by the smaller gene set. Enrichment is calculated as the number of overlapping genes observed divided by the number of overlapping genes predicted if genes were chosen randomly.

**Table S1. Target genes examined for each stress response pathway.**

| Target Gene     | Stress response pathway                 |
|-----------------|-----------------------------------------|
| <i>hsp-6</i>    | Mitochondrial unfolded protein response |
| <i>hsp-4</i>    | ER unfolded protein response            |
| <i>hsp-16.2</i> | Cytoplasmic unfolded protein response   |
| <i>sod-3</i>    | DAF-16-mediated stress response pathway |
| <i>gst-4</i>    | SKN-1-mediated stress response pathway  |
| <i>nhr-57</i>   | HIF-1-mediated hypoxia pathway          |
| <i>Y9C9A.8</i>  | p38-mediated innate immune pathway      |
| <i>trx-2</i>    | Antioxidant genes                       |

**Table S4. Effect of modulating ATFS-1 levels and activation on stress resistance, lifespan and expression of stress response genes.**

|                                             | <i>atfs-1(et15)</i><br>Gain-of-function | <i>atfs-1(et17)</i><br>Gain-of-function | <i>atfs-1(gk3094)</i><br>Loss-of-function |
|---------------------------------------------|-----------------------------------------|-----------------------------------------|-------------------------------------------|
| Acute oxidative stress resistance           | ↑                                       | ↑                                       | ↓                                         |
| Chronic oxidative stress resistance         | ↓                                       | ↑                                       | ↓                                         |
| Heat stress resistance                      | ↓                                       | =                                       | ↓                                         |
| Osmotic stress resistance                   | ↑                                       | ↑                                       | ↓                                         |
| Anoxia resistance                           | ↑                                       | ↑                                       | ↓                                         |
| Bacterial pathogens resistance              | ==                                      | ↓↑                                      | ↑↑                                        |
| Lifespan                                    | ↓                                       | ↓                                       | =                                         |
| <i>hsp-6</i> expression (mitoUPR)           | ↑                                       | ↑                                       | =                                         |
| <i>hsp-4</i> expression (ER-UPR)            | =                                       | =                                       | =                                         |
| <i>hsp-16.2</i> expression (Cyto-UPR)       | ↑ (NS)                                  | ↑ (NS)                                  | ↑ (NS)                                    |
| <i>sod-3</i> expression (DAF-16)            | ↑                                       | ↑                                       | =                                         |
| <i>gst-4</i> expression (SKN-1)             | =                                       | =                                       | =                                         |
| <i>nhr-57</i> expression (HIF-1)            | ↑                                       | =                                       | =                                         |
| <i>Y9C9A.8</i> expression (Innate immunity) | ↑                                       | ↑                                       | =                                         |
| <i>trx-2</i> (antioxidant)                  | ↑                                       | ↑                                       | =                                         |
